# Supplementary material for: Supra-molecular agents running tasks intelligently (SMARTI): recent developments in molecular logic-based computation
Source: Royal Society of Chemistry journal article supplement (doi:10.1039/d0me00082e), 2020-01-01
Supplement: d0me00082e1.pdf [file d0me00082e1.pdf]

Supplementary Information for

## Supra-Molecular Agents Running Tasks Intelligently (SMARTI): Recent Developments in Molecular Logic-based Computation

Chao-Yi Yao, Hong-Yu Lin, Hannah S. N. Crory and A. Prasanna de Silva

Table S1. List of sources of molecular logic devices and cases which are understandable as such (surname, initials, city, institute).

|    |               |    |                |                                   |
|----|---------------|----|----------------|-----------------------------------|
| 1  | schoening     | m  | aachen         | aachen univ appl sci              |
| 2  | ras           | r  | aalto          |                                   |
| 3  | birkedal      | v  | aarhus         |                                   |
| 4  | kjems         | j  | aarhus         |                                   |
| 5  | callan        | j  | aberdeen       | robert gordon univ                |
| 6  | algi          | mp | aksaray        |                                   |
| 7  | halamek       | j  | albany         | suny                              |
| 8  | yigit         | mv | albany         | suny                              |
| 9  | graves        | sw | albuquerque    | nm                                |
| 10 | stefanovich   | d  | albuquerque    | nm                                |
| 11 | sun           | lh | amherst        | ma                                |
| 12 | thayumanavan  | s  | amherst        | ma                                |
| 13 | zhuang        | jm | amherst        | ma                                |
| 14 | bhalla        | v  | amritsar       | guru nanak dev univ               |
| 15 | kumar         | s  | amritsar       | guru nanak dev univ               |
| 16 | kumar         | m  | amritsar       | guru nanak dev univ               |
| 17 | singh         | p  | amritsar       |                                   |
| 18 | akkaya        | eu | ankara         | bilkent                           |
| 19 | blaauw        | d  | ann arbor      | mi, univ mich                     |
| 20 | schnell       | s  | ann arbor      | mi                                |
| 21 | jayabharathi  | j  | annamalainagar | annamalai univ, tamil nadu        |
| 22 | chae          | ps | ansan          | hanyang univ campus outside seoul |
| 23 | kumar         | a  | ansan          | hanyang univ campus outside seoul |
| 24 | gao           | y  | anshan         | univ sci technol liaoning         |
| 25 | khanmohammadi | h  | arak           | iran                              |
| 26 | mallick       | a  | asansol        | west bengal, kazi nazrul univ     |
| 27 | lavis         | ld | ashburn        | va                                |
| 28 | petsalakis    | id | athens         | natl hellen res fdn               |
| 29 | tzeli         | d  | athens         | natl hellen res fdn               |
| 30 | minko         | s  | athens         | ga                                |
| 31 | dickson       | rm | atlanta        | ga, gatech                        |
| 32 | ke            | yg | atlanta        | emory univ                        |
| 33 | nie           | sm | atlanta        | emory univ                        |
| 34 | santangelo    | p  | atlanta        | ga, georgia inst technol          |

|    |             |     |             |                                  |
|----|-------------|-----|-------------|----------------------------------|
| 35 | wang        | bh  | atlanta     | ga                               |
| 36 | chen        | x   | austin      | tx                               |
| 37 | ellington   | ad  | austin      | tx                               |
| 38 | peppas      | na  | austin      | tx, ut                           |
| 39 | sessler     | jl  | austin      | tx                               |
| 40 | brites      | cds | aveiro      |                                  |
| 41 | carlos      | ld  | aveiro      |                                  |
| 42 | costa       | d   | aveiro      |                                  |
| 43 | figueiredo  | d   | aveiro      |                                  |
| 44 | martins     | ma  | aveiro      |                                  |
| 45 | inoue       | t   | baltimore   | md, johns hopkins univ           |
| 46 | schulman    | r   | baltimore   | md, johns hopkins univ           |
| 47 | govindaraju | t   | bangalore   |                                  |
| 48 | kurkuri     | md  | bangalore   |                                  |
| 49 | madhuprasad |     | bangalore   | jain univ                        |
| 50 | maji        | tk  | bangalore   | jawaharlal nehru ctr adv sci res |
| 51 | sivaraman   | g   | bangalore   |                                  |
| 52 | tuntulani   | c   | bangkok     |                                  |
| 53 | gallardo    | i   | barcelona   |                                  |
| 54 | guirardo    | g   | barcelona   |                                  |
| 55 | hernando    | j   | barcelona   |                                  |
| 56 | mas torrent | m   | barcelona   |                                  |
| 57 | posas       | f   | barcelona   | univ pompeu fabra                |
| 58 | ruiz-molina | d   | barcelona   |                                  |
| 59 | simao       | c   | barcelona   |                                  |
| 60 | sole        | rv  | barcelona   | univ pompeu fabra                |
| 61 | singh       | v   | bareilly    | invertis univ                    |
| 62 | constable   | ek  | basel       |                                  |
| 63 | wegner      | ha  | basel       |                                  |
| 64 | bull        | sd  | bath        |                                  |
| 65 | frost       | cg  | bath        |                                  |
| 66 | james       | td  | bath        |                                  |
| 67 | marken      | f   | bath        |                                  |
| 68 | sedgwick    | ac  | bath        |                                  |
| 69 | ji          | hf  | baton rouge | la                               |
| 70 | muller      | ahe | bayreuth    |                                  |
| 71 | ballauf     | m   | bayreuth    |                                  |
| 72 | hellweg     | t   | bayreuth    |                                  |
| 73 | schmalz     | h   | bayreuth    |                                  |
| 74 | alfonta     | l   | beersheva   |                                  |
| 75 | ashkenasy   | g   | beersheva   |                                  |
| 76 | bo          | xc  | beijing     | acad mil med sci                 |
| 77 | chen        |     | beijing     |                                  |
| 78 | ding        | bq  | beijing     | nat ctr nanosci technol          |
| 79 | fan         | lz  | beijing     | beijing normal univ              |
| 80 | fan         | qh  | beijing     | cas                              |

|     |        |    |         |                                             |
|-----|--------|----|---------|---------------------------------------------|
| 81  | fang   | cj | beijing | capital med univ                            |
| 82  | fu     |    | beijing |                                             |
| 83  | guo    | xf | beijing | peking univ                                 |
| 84  | hu     |    | beijing |                                             |
| 85  | huang  | kl | beijing |                                             |
| 86  | jiang  | jz | beijing | univ sci technol beijing                    |
| 87  | jiang  | c  | beijing |                                             |
| 88  | jiang  | xy | beijing | cas                                         |
| 89  | ju     | y  | beijing |                                             |
| 90  | li     | my | beijing | peking univ                                 |
| 91  | li     | yl | beijing | cas                                         |
| 92  | li     | xh | beijing | beijing normal univ                         |
| 93  | lin    | c  | beijing | beijing normal univ                         |
| 94  | liu    | hy | beijing | beijing normal univ                         |
| 95  | liu    | wm | beijing | cas tech inst phys & chem                   |
| 96  | liu    | f  | beijing | peking univ                                 |
| 97  | liu    | mh | beijing | cas                                         |
| 98  | lv     | ft | beijing |                                             |
| 99  | ma     | hm | beijing | cas                                         |
| 100 | nang   |    | beijing |                                             |
| 101 | ouyang | q  | beijing | ctr quan biol                               |
| 102 | qi     | cm | beijing | beijing normal univ                         |
| 103 | rao    | y  | beijing | peking univ                                 |
| 104 | shi    |    | beijing |                                             |
| 105 | shi    |    | beijing |                                             |
| 106 | shi    | q  | beijing | cas                                         |
| 107 | shu    | qh | beijing |                                             |
| 108 | tan    | tw | beijing | beijing univ chem technol                   |
| 109 | tang   | yl | beijing |                                             |
| 110 | tong   | aj | beijing | tsinghua univ                               |
| 111 | wang   | s  | beijing | cas                                         |
| 112 | wang   | kz | beijing | beijing normal univ                         |
| 113 | wang   | zg | beijing | nat ctr nanosci technol                     |
| 114 | wang   | z  | beijing | nat ctr nanosci technol                     |
| 115 | wei    | m  | beijing | beijing univ chem technol                   |
| 116 | wei    |    | beijing |                                             |
| 117 | wen    | yq | beijing | univ sci technol beijing                    |
| 118 | wu     | lz | beijing | cas key lab photochem convers & optoelect m |
| 119 | xiao   | x  | beijing | univ sci technol beijing                    |
| 120 | xing   |    | beijing |                                             |
| 121 | xu     | wt | beijing | china agric univ                            |
| 122 | xu     | dg | beijing | inst military cogn brain sci                |
| 123 | yan    | ch | beijing | peking univ                                 |
| 124 | yang   |    | beijing |                                             |
| 125 | yang   | j  | beijing | north china electric power univ             |
| 126 | yao    | jn | beijing | cas                                         |

|     |               |    |             |                                  |
|-----|---------------|----|-------------|----------------------------------|
| 127 | yi            | l  | beijing     | beijing univ chem technol        |
| 128 | yuan          |    | beijing     |                                  |
| 129 | zhang         | dq | beijing     | chinese acad sci inst chem       |
| 130 | zhang         | zq | beijing     |                                  |
| 131 | zhang         | c  | beijing     | peking univ                      |
| 132 | zhao          | ys | beijing     | cas                              |
| 133 | zhao          | mp | beijing     | peking univ                      |
| 134 | zhong         |    | beijing     |                                  |
| 135 | zhong         | yw | beijing     | cas                              |
| 136 | zhou          | j  | beijing     | capital normal univ              |
| 137 | zhou          | ys | beijing     | peking univ sch hosp stomatology |
| 138 | zhu           | db | beijing     |                                  |
| 139 | de silva      | ap | belfast     | ni                               |
| 140 | cao           | c  | belfast     | ni                               |
| 141 | kigga         | m  | bengaluru   | jain univ                        |
| 142 | kurkuri       | m  | bengaluru   | jain univ                        |
| 143 | arkin         | ap | berkeley    | ca                               |
| 144 | chang         | cj | berkeley    | ca                               |
| 145 | hecht         | s  | berlin      | humboldt iniv                    |
| 146 | paulus        | b  | berlin      |                                  |
| 147 | rurack        | k  | berlin      | bam, humboldt univ               |
| 148 | schalley      | c  | berlin      |                                  |
| 149 | adhya         | s  | bethesda    | md, natl inst health+D303        |
| 150 | das           | a  | bhavnagar   | gujarat                          |
| 151 | neogi         | s  | bhavnagar   | csir-csmcri, gujarat             |
| 152 | sankar        | j  | bhopal      |                                  |
| 153 | sakai         | k  | bibi        | chitose inst sci technol         |
| 154 | patra         | gk | bilaspur    | cg                               |
| 155 | cheong        | as | birmingham  | uk                               |
| 156 | stoddart      | jf | birmingham  | uk                               |
| 157 | boudouris     |    | bloomington | in                               |
| 158 | flood         | ah | bloomington | in                               |
| 159 | lee           | dw | bloomington | in, indiana univ                 |
| 160 | yurke         | b  | boise       | id                               |
| 161 | knowlton      | wb | boise       | id                               |
| 162 | balzani       | v  | bologna     |                                  |
| 163 | credi         | a  | bologna     |                                  |
| 164 | venturi       | m  | bologna     |                                  |
| 165 | famulok       | m  | bonn        | univ bonn                        |
| 166 | voegtler      | f  | bonn        |                                  |
| 167 | bassani       | d  | bordeaux    |                                  |
| 168 | bouas-laurent | h  | bordeaux    |                                  |
| 169 | desvergne     | jp | bordeaux    |                                  |
| 170 | mcclenaghan   | nd | bordeaux    |                                  |
| 171 | pozzo         | jl | bordeaux    |                                  |
| 172 | collins       | jj | boston      | ma, harvard                      |

|     |              |     |            |                         |
|-----|--------------|-----|------------|-------------------------|
| 173 | konry        | t   | boston     | ma                      |
| 174 | lin          | ys  | boston     | ma                      |
| 175 | sykes        | c   | boston     | ma                      |
| 176 | walt         | dr  | boston     | ma, medford             |
| 177 | wong         | ww  | boston     | ma, boston univ         |
| 178 | romieu       | a   | bourgogne  | dijon                   |
| 179 | mano         | jf  | braga      | univ minho              |
| 180 | nau          | w   | bremen     |                         |
| 181 | alexandrov   | k   | brisbane   | queensland univ technol |
| 182 | adamatzky    | a   | bristol    |                         |
| 183 | semsey       | s   | budapest   | eotvos lorand univ      |
| 184 | das          | d   | burdwan    | west bengal             |
| 185 | sahu         | sn  | burla      | odisha, sambalpur univ  |
| 186 | ha           | ms  | busan      |                         |
| 187 | caltagirone  | c   | cagliari   |                         |
| 188 | scorciapino  | ma  | cagliari   |                         |
| 189 | chaur        | mn  | cali       | univ valle              |
| 190 | chin         | j   | cambridge  | uk                      |
| 191 | keyser       | uf  | cambridge  | uk                      |
| 192 | knowles      | tpj | cambridge  | uk                      |
| 193 | nitschke     | j   | cambridge  | uk                      |
| 194 | phillips     | a   | cambridge  | uk                      |
| 195 | aspuru-guzik | a   | cambridge  | ma, harvard             |
| 196 | benenson     | y   | cambridge  | ma, harvard             |
| 197 | bhatia       | sn  | cambridge  | ma harvard              |
| 198 | church       | gm? | cambridge  | ma, harvard             |
| 199 | gagnon       | js  | cambridge  | ma, harvard             |
| 200 | green        | aa  | cambridge  | ma, harvard             |
| 201 | lu           | tk  | cambridge  | ma, mit                 |
| 202 | silver       | pa  | cambridge  | ma, harvard univ        |
| 203 | voigt        | ca  | cambridge  | ma, mit                 |
| 204 | weiss        | r   | cambridge  | ma, mit                 |
| 205 | yin          | p   | cambridge  | ma, harvard             |
| 206 | zhang        |     | cambridge  | ma                      |
| 207 | whitesides   | g   | cambridge  | ma                      |
| 208 | humphrey     | mg  | canberra   | aus natl univ           |
| 209 | fallis       | i   | cardiff    |                         |
| 210 | kaur         | n   | chandigarh | panjab univ             |
| 211 | bu           |     | changchun  |                         |
| 212 | dong         | sj  | changchun  |                         |
| 213 | duan         |     | changchun  | jilin                   |
| 214 | guo          | cl  | changchun  |                         |
| 215 | hu           | j   | changchun  |                         |
| 216 | li           | j   | changchun  |                         |
| 217 | li           | b   | changchun  | cas                     |
| 218 | lin          |     | changchun  |                         |

|     |          |    |                 |                       |
|-----|----------|----|-----------------|-----------------------|
| 219 | liu      | yq | changchun       |                       |
| 220 | liu      | fq | changchun       | jilin                 |
| 221 | liu      | dl | changchun       | jilin univ            |
| 222 | qu       | xg | changchun       |                       |
| 223 | ren      | js | changchun       |                       |
| 224 | song     | yq | changchun       | jilin univ            |
| 225 | sun      | j  | changchun       | jilin                 |
| 226 | wang     | ek | changchun       |                       |
| 227 | yang     | xr | changchun       |                       |
| 228 | yang     | ws | changchun       | jilin                 |
| 229 | yang     | yw | changchun       | jilin univ            |
| 230 | zhang    | lm | changchun       | cas                   |
| 231 | deng     | l  | changsha        |                       |
| 232 | ding     | xz | changsha        | hunan normal univ     |
| 233 | huan     | sy | changsha        |                       |
| 234 | huang    | wt | changsha        | hunan normal univ     |
| 235 | huang    | j  | changsha        | hunan univ            |
| 236 | liang    | b  | changsha        |                       |
| 237 | lin      | wy | changsha        | hunan                 |
| 238 | liu      | zc | changsha        |                       |
| 239 | liu      | yn | changsha        | south west univ       |
| 240 | liu      | ml | changsha        | hunan normal univ     |
| 241 | nie      | zk | changsha        |                       |
| 242 | nie      | z  | changsha        |                       |
| 243 | tan      | wh | changsha        | hunan                 |
| 244 | wang     | km | changsha        | hunan univ            |
| 245 | yang     | rh | changsha        |                       |
| 246 | yang     | xh | changsha        | hunan univ            |
| 247 | zhang    | xb | changsha        |                       |
| 248 | zhang    | yy | changsha        | hunan normal univ     |
| 249 | luo      | zg | changsha        | natl univ def technol |
| 250 | li       | zy | changzhou       | jiangsu univ technol  |
| 251 | xu       | s  | changzhou       | jiangsu univ technol  |
| 252 | yang     | rm | changzhou       | jiangsu univ technol  |
| 253 | pu       | l  | charlottesville | va                    |
| 254 | ai       | h  | chengdu         | sichuan univ          |
| 255 | gao      | hl | chengdu         | sichuan univ          |
| 256 | gao      | dj | chengdu         | sichuan normal univ   |
| 257 | ning     | zl | chengdu         | sichuan normal univ   |
| 258 | song     | f  | chengdu         |                       |
| 259 | wang     | yz | chengdu         |                       |
| 260 | wu       |    | chengdu         |                       |
| 261 | yang     | s  | chengdu         |                       |
| 262 | yang     | qf | chengdu         | sichuan univ          |
| 263 | chereddy | nr | chennai         | clri                  |
| 264 | ghosh    | s  | chennai         | iitm                  |

|     |                |    |                 |                                  |
|-----|----------------|----|-----------------|----------------------------------|
| 265 | kandaswamy     |    | chennai         |                                  |
| 266 | kathiravan     | a  | chennai         | vel tech res park                |
| 267 | prasad         | e  | chennai         | iitm                             |
| 268 | thennarasu     | s  | chennai         | clri                             |
| 269 | frasconi       | m  | chicago         | il, northwestern                 |
| 270 | jewett         | mc | chicago         | il, northwestern                 |
| 271 | liu            |    | chicago         | il                               |
| 272 | renaud         | n  | chicago         | il, northwestern                 |
| 273 | stoddart       | jf | chicago         | il, northwestern                 |
| 274 | wasielewski    | m  | chicago         | il, northwestern                 |
| 275 | yang           | xj | chicago         | univ illinois                    |
| 276 | yu             | lp | chicago         | il                               |
| 277 | li             | yf | chongqing       | southwest univ                   |
| 278 | chen           | h  | chongqing       | chongqing univ                   |
| 279 | ding           | sj | chongqing       | chongqing med univ               |
| 280 | feng           | xl | chongqing       | chongqing univ                   |
| 281 | he             | yq | chongqing       |                                  |
| 282 | hu             | xl | chongqing       | southwest univ                   |
| 283 | huang          |    | chongqing       |                                  |
| 284 | ju             | hx | chongqing       | chongqing med univ               |
| 285 | li             | nb | chongqing       |                                  |
| 286 | luo            | hq | chongqing       | southwest univ                   |
| 287 | wang           | tt | chongqing       | chongqing med univ               |
| 288 | zhao           | y  | chongqing       | chongqing univ                   |
| 289 | enoch          | i  | coimbatore      | karunya                          |
| 290 | murugeapandian | b  | coimbatore      | bharathiyar univ                 |
| 291 | nandhakumar    | r  | coimbatore      |                                  |
| 292 | selvakumar     | pm | coimbatore      | karunya                          |
| 293 | thangadurai    | td | coimbatore      | sri ramakrishna engn coll        |
| 294 | yousuf         | s  | coimbatore      | karunya                          |
| 295 | callan         | j  | coleraine       | ni                               |
| 296 | crooks         | rm | college station | tx                               |
| 297 | durncke        | s  | cologne         |                                  |
| 298 | glass          | te | columbia        | mo                               |
| 299 | czarnik        | aw | columbus        | oh                               |
| 300 | semsey         | s  | copenhagen      | niels bohr inst                  |
| 301 | redmond        | g  | cork            | tyndall inst                     |
| 302 | shvarev        | a  | corvallis       | or, oregon state univ            |
| 303 | kim            | hs | daegu           | kyungpook national univ          |
| 304 | ha             | th | daejeon         | korea res inst biosci biotechnol |
| 305 | lee            | ts | daejeon         | chungnam natl univ               |
| 306 | chen           | bj | dalian          | dalian maritime univ             |
| 307 | qian           | xh | dalian          |                                  |
| 308 | wang           | b  | dalian          | dalian univ                      |
| 309 | xu             | s  | dalian          | dalian maritime univ             |
| 310 | zhang          | q  | dalian          | dalian univ                      |

|     |              |     |            |                                                |
|-----|--------------|-----|------------|------------------------------------------------|
| 311 | sumerlin     | bs  | dallas     | southern methodist univ                        |
| 312 | yokobayashi  | y   | davis      | ca                                             |
| 313 | mammana      | a   | dayton     | oh, univ dayton                                |
| 314 | conrad       | m   | detroit    | mi                                             |
| 315 | singh        | h   | detroit    | mi                                             |
| 316 | helal        | a   | dhahran    | king fahd univ petrol minerals                 |
| 317 | bradberry    | s   | dublin     | trinity                                        |
| 318 | gunnlaugsson | t   | dublin     | trinity                                        |
| 319 | o'shea       | d   | dublin     | univ coll dublin and roy coll surgeons ireland |
| 320 | banerjee     | p   | durgapur   |                                                |
| 321 | panja        | ss  | durgapur   | west bengal                                    |
| 322 | parker       | d   | durham     | uk                                             |
| 323 | stead        | j   | durham     | uk                                             |
| 324 | williams     | jag | durham     | uk                                             |
| 325 | dwyer        | c   | durham     | nc, duke                                       |
| 326 | pang         | j   | durham     | nc, duke                                       |
| 327 | reif         | jh  | durham     | nc, duke                                       |
| 328 | zurbriggen   | m   | dusseldorf |                                                |
| 329 | cockroft     | sl  | edinburgh  |                                                |
| 330 | leigh        | d   | edinburgh  |                                                |
| 331 | robertson    | n   | edinburgh  |                                                |
| 332 | vendrell     | m   | edinburgh  | inst inflammation                              |
| 333 | wang         | bj  | edinburgh  |                                                |
| 334 | huff         | t   | edmonton   | alberta                                        |
| 335 | mondal       | pc  | edmonton   | alberta                                        |
| 336 | wolkow       | ra  | edmonton   | alberta                                        |
| 337 | ogawa        | a   | ehime      |                                                |
| 338 | maeda        | m   | ehime      |                                                |
| 339 | merkx        | m   | eindhoven  |                                                |
| 340 | amirmasr     | m   | esfahan    | isfahan univ technol                           |
| 341 | haley        | mm  | eugene     | or, univ oregon                                |
| 342 | bone         | sm  | eveleigh   | nsw                                            |
| 343 | bignozzi     | cx  | ferrara    |                                                |
| 344 | johnson      |     | florida    |                                                |
| 345 | walther      | a   | freiburg   |                                                |
| 346 | akiyama      | t   | fukuoka    | kyushu univ                                    |
| 347 | kubo         | k   | fukuoka    | kyushu univ                                    |
| 348 | nakakuki     | t   | fukuoka    | kyushu inst technol                            |
| 349 | ojida        | a   | fukuoka    | kyushu univ                                    |
| 350 | shinkai      | s   | fukuoka    | kyushu univ                                    |
| 351 | yamada       | s   | fukuoka    | kyushu univ                                    |
| 352 | zhang        | l   | fushun     | liaoning shihua univ                           |
| 353 | qiao         | r   | fuyang     | fuyang normal univ, anhui                      |
| 354 | chen         | w   | fuzhou     |                                                |
| 355 | fu           | ny  | fuzhou     |                                                |
| 356 | li           | j   | fuzhou     | fuzhou univ                                    |



|     |                |    |             |                                         |
|-----|----------------|----|-------------|-----------------------------------------|
| 357 | lin            | zh | fuzhou      |                                         |
| 358 | ling           | qd | fuzhou      |                                         |
| 359 | liu            | al | fuzhou      | fujian med univ                         |
| 360 | wu             | zs | fuzhou      | fujian prov key lab                     |
| 361 | tan            | wh | gainesville | fl                                      |
| 362 | bandyopadhyay  | d  | gauhati     | iit                                     |
| 363 | biswas         | s  | gauhati     | iit                                     |
| 364 | chattopadhyay  | a  | gauhati     | assam, iit                              |
| 365 | das            | dk | gauhati     | assam                                   |
| 366 | ghosh          | ss | gauhati     | iit                                     |
| 367 | krishnamoorthy | g  | gauhati     |                                         |
| 368 | winssinger     | n  | geneva      |                                         |
| 369 | hoogenboom     | r  | ghent       |                                         |
| 370 | andreasson     | j  | gothenburg  | chalmers univ technol                   |
| 371 | moth-poulsen   | k  | gothenburg  | chalmers univ technol                   |
| 372 | nyokong        | t  | grahamstown | rhodes univ                             |
| 373 | cuerva         | jm | granada     |                                         |
| 374 | crovetto       | l  | granada     |                                         |
| 375 | wolfbeis       | os | graz        |                                         |
| 376 | browne         | w  | groningen   |                                         |
| 377 | feringa        | bl | groningen   |                                         |
| 378 | herrmann       | a  | groningen   |                                         |
| 379 | otto           | s  | groningen   |                                         |
| 380 | chen           | jh | guangzhou   | guandong inst ecoenvironmental sci tech |
| 381 | chen           | jh | guangzhou   | guandong inst ecoenviron sci technol    |
| 382 | chi            | zg | guangzhou   | sunyatsen univ                          |
| 383 | jiang          | zj | guangzhou   | jinan univ                              |
| 384 | ling           | ls | guangzhou   | sunyatsen univ                          |
| 385 | liu            | wp | guangzhou   | south china agric univ                  |
| 386 | liu            | yj | guangzhou   | south china agric univ                  |
| 387 | wang           | qm | guangzhou   |                                         |
| 388 | wu             | sz | guangzhou   |                                         |
| 389 | yang           | zy | guangzhou   | sunyatsen univ                          |
| 390 | ye             |    | guangzhou   |                                         |
| 391 | yi             | cq | guangzhou   | sunyatsen univ                          |
| 392 | zeng           | lw | guangzhou   |                                         |
| 393 | zeng           | f  | guangzhou   |                                         |
| 394 | zhou           | sg | guangzhou   | guangdong inst ecoenvironm soil sci     |
| 395 | zhou           | hb | guangzhou   | jinan univ                              |
| 396 | xu             | yj | guiyang     | guizhou univ                            |
| 397 | zhang          | h  | guiyang     | guizhou univ                            |
| 398 | sahoo          | sk | gujarat     |                                         |
| 399 | shaishta       | n  | gulbarga    | gulbarga univ                           |
| 400 | eichen         | y  | haifa       | technion                                |
| 401 | lotan          | n  | haifa       | technion                                |
| 402 | speiser        | s  | haifa       | technion                                |

|     |            |    |            |                          |
|-----|------------|----|------------|--------------------------|
| 403 | chen       | y  | haikou     | hainan univ              |
| 404 | du         | j  | haikou     | hainan univ              |
| 405 | theato     | p  | hamburg    |                          |
| 406 | puri       | k  | hamilton   | ontario                  |
| 407 | huang      | fh | hangzhou   | zhejiang univ            |
| 408 | ji         | j  | hangzhou   | zhejiang univ            |
| 409 | jiang      |    | hangzhou   |                          |
| 410 | jin        | q  | hangzhou   | zhejiang univ            |
| 411 | li         | b  | hangzhou   | zhejiang univ            |
| 412 | liu        | bb | hangzhou   |                          |
| 413 | lu         | p  | hangzhou   | zhejiang univ            |
| 414 | qian       | gd | hangzhou   | zhejiang univ            |
| 415 | qiu        | hy | hangzhou   | hangzhou normal univ     |
| 416 | shen       | yq | hangzhou   |                          |
| 417 | wu         | j  | hangzhou   |                          |
| 418 | xu         | zk | hangzhou   |                          |
| 419 | xu         | xh | hangzhou   | zhejiang acad agric sci  |
| 420 | yin        | sc | hangzhou   | hangzhou normal univ     |
| 421 | zhang      | q  | hangzhou   | hangzhou normal univ     |
| 422 | aprahamian | i  | hanover    | nh, dartmouth            |
| 423 | fan        | rq | harbin     | harbin inst technol      |
| 424 | xia        | wj | harbin     | harbin inst technol      |
| 425 | xing       | zy | harbin     | notheast agric univ      |
| 426 | yang       | yl | harbin     | harbin inst technol      |
| 427 | kawano     | r  | harumicho  | tokyo univ agric technol |
| 428 | cui        | h  | hefei      | univ sci technol china   |
| 429 | deng       | zx | hefei      | univ sci technol china   |
| 430 | li         | t  | hefei      | univ sci technol china   |
| 431 | liang      | hj | hefei      |                          |
| 432 | liu        | sy | hefei      |                          |
| 433 | lu         |    | hefei      |                          |
| 434 | ma         |    | hefei      |                          |
| 435 | shi        | ll | hefei      | univ sci technol china   |
| 436 | song       | qh | hefei      |                          |
| 437 | wang       | yq | hefei      | anhui jianzhu univ       |
| 438 | wang       | j  | hefei      | univ sci technol china   |
| 439 | xiao       | sy | hefei      |                          |
| 440 | yao        | db | hefei      |                          |
| 441 | zhang      | gq | hefei      |                          |
| 442 | zhang      | j  | hefei      | anhui jianzhu univ       |
| 443 | zhang      | zp | hefei      | cas                      |
| 444 | zou        | ws | hefei      | anhui jianzhu univ       |
| 445 | trapp      | o  | heidelberg |                          |
| 446 | zharnikov  | m  | heidelberg |                          |
| 447 | leung      | ch | hongkong   |                          |
| 448 | lo         | pk | hongkong   | city univ hongkong       |

|     |              |     |            |                               |
|-----|--------------|-----|------------|-------------------------------|
| 449 | ma           | dl  | hongkong   | hongkong baptist univ         |
| 450 | ng           | d   | hongkong   |                               |
| 451 | yam          | vww | hongkong   |                               |
| 452 | tour         | jm  | houston    | tx, rice univ                 |
| 453 | suh          | j   | houston    | tx, rice univ                 |
| 454 | mahapatra    |     | howrah     |                               |
| 455 | goswami      | s   | howrah     |                               |
| 456 | chung        | ws  | hsinchu    | natl chiao tung univ          |
| 457 | hsiue        | gh  | hsinchu    | taiwan                        |
| 458 | pischel      | u   | huelva     |                               |
| 459 | mehl         | gh  | hull       |                               |
| 460 | sadeghi      | sm  | huntsville | al                            |
| 461 | bangal       | pr  | hyderabad  |                               |
| 462 | samanta      | a   | hyderabad  |                               |
| 463 | pasparakis   | g   | iraklion   | crete, fdn res technol hellas |
| 464 | vamvakaki    | m   | iraklion   | crete, fdn res technol hellas |
| 465 | fujimoto     | k   | ishikawa   | japan adv inst sci technol    |
| 466 | ekmekci      | z   | isparta    | isparta univ appl sci         |
| 467 | angenent     | la  | ithaca     | ny, cornell                   |
| 468 | emrullahoglu | m   | izmir      |                               |
| 469 | kuwar        | as  | jalgaon    | maharashtra                   |
| 470 | schiller     | a   | jena       | friedrich schiller univ       |
| 471 | ramu         | v   | jena       | friedrich schiller univ       |
| 472 | willner      | i   | jerusalem  | hebrew univ                   |
| 473 | li           | qh  | jibo       | shandong                      |
| 474 | jiang        | sm  | jilin      |                               |
| 475 | liu          |     | jilin      |                               |
| 476 | wang         |     | jilin      |                               |
| 477 | he           |     | jilin?     |                               |
| 478 | wang         |     | jilin?     |                               |
| 479 | wu           |     | jilin?     |                               |
| 480 | chen         | g   | jinan      | univ jinan                    |
| 481 | ge           | sg  | jinan      | shandong                      |
| 482 | lin          | wy  | jinan      | shandong                      |
| 483 | liu          | xy  | jinan      | shandong                      |
| 484 | yu           | jh  | jinan      | shandong                      |
| 485 | zhao         | p   | jinan      | univ jinan                    |
| 486 | zou          | dq  | jinan      | shandong univ                 |
| 487 | li           |     | jinan?     |                               |
| 488 | jung         | jh  | jinju      | gyeongsang natl univ          |
| 489 | tang         | lj  | jinzhou    | liaoning                      |
| 490 | gupta        | rd  | julich     |                               |
| 491 | mayer        | d   | julich     |                               |
| 492 | porghossian  |     | julich     |                               |
| 493 | schoning     | m   | julich     | aachen univ appl sci          |
| 494 | ghosh        | k   | kalyani    |                               |

|     |              |     |                |                                            |
|-----|--------------|-----|----------------|--------------------------------------------|
| 495 | mukherjee    | s   | kalyani        | west bengal                                |
| 496 | majumdar     | t   | kalyani        | west bengal                                |
| 497 | bharadwaj    | p   | kanpur         | iit                                        |
| 498 | khan         |     | kanpur         |                                            |
| 499 | moorthy      | jn  | kanpur         | iit                                        |
| 500 | yang         | cn  | kaohsiung      | natl univ kaohsiung                        |
| 501 | tseng        | wl  | kaohsiung      | natl sun yat sen univ                      |
| 502 | stalin       | t   | karaikudi      |                                            |
| 503 | meier        | mar | karlsruhe      |                                            |
| 504 | thiruvadigal | dj  | kattankulathur |                                            |
| 505 | takeuchi     | s   | kawasaki       | kanagawa acad sci technol                  |
| 506 | huang        | cc  | keelung        | taiwan                                     |
| 507 | pal          | t   | kharagpur      |                                            |
| 508 | patra        | sk  | kharagpur      |                                            |
| 509 | mir          | a   | khorramabad    | lorestan univ                              |
| 510 | rajesh       | j   | kilakarai      | tamil nadu                                 |
| 511 | darwish      | ta  | kirrawee       | australia                                  |
| 512 | hanley       | tl  | kirrawee       | australia                                  |
| 513 | sugimoto     | n   | kobe           | konan univ                                 |
| 514 | matsui       | j   | kobe           | konan univ                                 |
| 515 | ali          | m   | kolkata        | jadavpur univ                              |
| 516 | bagh         | s   | kolkata        | saha inst nucl phys                        |
| 517 | baitalik     | s   | kolkata        | jadavpur univ                              |
| 518 | bhattacharya | sc  | kolkata        |                                            |
| 519 | dash         | j   | kolkata        | iacs                                       |
| 520 | maiti        | sk  | kolkata        | indian statistics inst                     |
| 521 | mondal       | tk  | kolkata        | jadavpur univ                              |
| 522 | nandi        |     | kolkata        |                                            |
| 523 | roy          | p   | kolkata        |                                            |
| 524 | saha         | a   | kolkata        | jadavpur univ                              |
| 525 | sinha        | c   | kolkata        | jadavpur                                   |
| 526 | saito        | i   | koriyama       | nihon univ                                 |
| 527 | godlewski    | s   | krakow         | jagiellonian univ                          |
| 528 | pilarczyk    | k   | krakow         | jagiellonian univ                          |
| 529 | szacilowski  | k   | krakow         | jagiellonian univ and agh univ sci technol |
| 530 | uchacz       | t   | krakow         | jagiellonian univ                          |
| 531 | maeda        | h   | kusatsu        | ritsumeikan univ                           |
| 532 | hamachi      | i   | kyoto          |                                            |
| 533 | okamoto      | a   | kyoto          |                                            |
| 534 | saito        | h   | kyoto          |                                            |
| 535 | kimura       |     | kyushu?        |                                            |
| 536 | ghadiri      | mr  | la jolla       | ca, scripps                                |
| 537 | barbas       | c   | la jolla       | ca, scripps                                |
| 538 | lerner       | r   | la jolla       | ca, scripps                                |
| 539 | li           | r   | lanzhou        |                                            |
| 540 | li           | q   | lanzhou        | gansu agric univ                           |

|     |                |     |             |                                       |
|-----|----------------|-----|-------------|---------------------------------------|
| 541 | lin            | q   | lanzhou     | northwest normal univ                 |
| 542 | lu             |     | lanzhou     |                                       |
| 543 | ma             | jt  | lanzhou     |                                       |
| 544 | peng           | y   | lanzhou     |                                       |
| 545 | shao           | sj  | lanzhou     | cas                                   |
| 546 | tang           | y   | lanzhou     | lanzhou univ                          |
| 547 | wang           | yw  | lanzhou     |                                       |
| 548 | wang           | bd  | lanzhou     |                                       |
| 549 | wei            | tb  | lanzhou     | northwest normal univ                 |
| 550 | yang           | zy  | lanzhou     |                                       |
| 551 | grigg          | r   | leeds       |                                       |
| 552 | dehaen         | w   | leuven      |                                       |
| 553 | li             | g   | liaocheng   |                                       |
| 554 | wang           | lp  | liaocheng   |                                       |
| 555 | yan            | b   | liaocheng   | liaocheng univ                        |
| 556 | remacle        | f   | liege       |                                       |
| 557 | delbaere       | s   | lille       |                                       |
| 558 | basilio        | n   | lisboa      | univ nova lisboa                      |
| 559 | lodeiro        | c   | lisboa      | univ nova lisboa                      |
| 560 | nunez          | c   | lisboa      | univ nova lisboa                      |
| 561 | oliveira       | e   | lisboa      | univ nova lisboa                      |
| 562 | pina           | f   | lisboa      | univ nova lisboa                      |
| 563 | pischel        | u   | lisboa      |                                       |
| 564 | anderluh       | gf  | ljubljana   | natl inst chem slovenia               |
| 565 | jerala         | r   | ljubljana   | natl inst chem slovenia               |
| 566 | berreau        | lm  | logan       | ut, utah state univ                   |
| 567 | bligh          | swa | london      | univ westminster                      |
| 568 | buck           | m   | london      | imperial coll sci technol             |
| 569 | chatterton     | np  | london      | london met univ                       |
| 570 | howorka        | s   | london      | ucl                                   |
| 571 | thanh          | ntk | london      | ucl                                   |
| 572 | utley          | jhp | london      | queen mary coll                       |
| 573 | konermann      | l   | london      | ontario, univ western ontario         |
| 574 | kanungo        | bk  | longowal    | punjab sant longowal inst eng technol |
| 575 | doorn          | sk  | los alamos  | nm, los alamos natl lab               |
| 576 | heath          | j   | los angeles | ca                                    |
| 577 | stoddart       | jf  | los angeles | ca                                    |
| 578 | zink           | j   | los angeles | ca                                    |
| 579 | garcia         | y   | louvain     |                                       |
| 580 | safin          | da  | louvain     | univ catholique louvain               |
| 581 | hasserodt      | j   | lyon        |                                       |
| 582 | leung          | ch  | macau       |                                       |
| 583 | gong           | sq  | madison     | wi, univ wisconsin                    |
| 584 | de la escosura | a   | madrid      |                                       |
| 585 | de lorenzo     | v   | madrid      | cent nac biotech                      |
| 586 | torres         | t   | madrid      |                                       |

|     |                 |    |             |                                       |
|-----|-----------------|----|-------------|---------------------------------------|
| 587 | annaraj         | j  | madurai     | madurai kamaraj univ                  |
| 588 | ayyanar         | s  | madurai     | madurai kamaraj univ                  |
| 589 | sivaraman       | g  | madurai     | madurai kamaraj univ                  |
| 590 | theato          | p  | mainz       |                                       |
| 591 | perez-inestrosa | e  | malaga      |                                       |
| 592 | ghosh           | s  | mandi       | himachal                              |
| 593 | siri            | o  | marseilles  |                                       |
| 594 | evans           |    | melbourne   |                                       |
| 595 | hughes          | tc | melbourne   | csiro                                 |
| 596 | langford        | s  | melbourne   | monash univ                           |
| 597 | campagna        | s  | messina     |                                       |
| 598 | pandiyar        | t  | mexico city |                                       |
| 599 | raymo           | fm | miami       | fl                                    |
| 600 | he              | y  | mianyang    | southwest univ sci tech, near chengdu |
| 601 | quici           | s  | milano      | cnr                                   |
| 602 | wang            | c  | minneapolis | mn, univ minnesota                    |
| 603 | banerjee        | r  | mohanpur    | iiser kolkata                         |
| 604 | saha            | s  | mohanpur    | iiser kolkata                         |
| 605 | purkayasth      | p  | mohanpur    | iiser kolkata                         |
| 606 | de silva        | sa | montclair   | nj                                    |
| 607 | krouk           | g  | montpellier | inst claude grignon                   |
| 608 | molina          | f  | montpellier |                                       |
| 609 | bonnet          | j  | montpellier |                                       |
| 610 | budyka          | mf | moscow      |                                       |
| 611 | nikitin         | mp | moscow      |                                       |
| 612 | magri           | dc | msida       | malta                                 |
| 613 | shankarling     | gs | mumbai      |                                       |
| 614 | rao             | cp | mumbai      | iit bombay                            |
| 615 | shah            |    | mumbai?     |                                       |
| 616 | khisamutdinov   | ee | muncie      | in, ball state univ                   |
| 617 | carell          | t  | munich      |                                       |
| 618 | dube            | h  | munich      |                                       |
| 619 | gerland         | u  | munich      |                                       |
| 620 | mahmoud         | a  | munich      |                                       |
| 621 | margapoti       |    | munich      |                                       |
| 622 | martlbauer      | e  | munich      |                                       |
| 623 | palma           |    | munich      |                                       |
| 624 | simmel          | fc | munich      |                                       |
| 625 | yurke           | b  | murray hill | nj, bell labs                         |
| 626 | pu              | sz | nanchang    |                                       |
| 627 | qiu             | jd | nanchang    |                                       |
| 628 | liu             | g  | nanchang    | jiangxi sci tech normal univ          |
| 629 | bao             | x  | nanjing     | nanjing univ sci technol              |
| 630 | chen            | rf | nanjing     | nanjing univ posts telecom            |
| 631 | cheng           |    | nanjing     |                                       |
| 632 | du              | xz | nanjing     |                                       |

|     |             |    |            |                                        |
|-----|-------------|----|------------|----------------------------------------|
| 633 | fu          | jj | nanjing    | nanjing univ sci technol               |
| 634 | huang       | w  | nanjing    |                                        |
| 635 | huang       |    | nanjing    |                                        |
| 636 | jiang       | lp | nanjing    |                                        |
| 637 | ju          | xs | nanjing    |                                        |
| 638 | li          | gx | nanjing    | nanjing univ                           |
| 639 | lu          | zh | nanjing    | nanjing univ                           |
| 640 | shen        |    | nanjing    |                                        |
| 641 | sun         |    | nanjing    |                                        |
| 642 | tao         | y  | nanjing    | nanjing univ posts telecom             |
| 643 | wan         | q  | nanjing    |                                        |
| 644 | wang        | lh | nanjing    | nanjing univ posts telecom             |
| 645 | zhang       | l  | nanjing    | nanjing univ posts telecom             |
| 646 | zhang       | c  | nanjing    | southeast univ                         |
| 647 | zhao        | q  | nanjing    |                                        |
| 648 | zhao        |    | nanjing    |                                        |
| 649 | zhu         | jj | nanjing    | nanjing univ                           |
| 650 | iwai        | k  | nara       |                                        |
| 651 | wittman     | dm | neuerberg  |                                        |
| 652 | awasthi     | sk | new delhi  | univ delhi                             |
| 653 | gupta       | t  | new delhi  | univ delhi                             |
| 654 | gupta       | rd | new delhi  | south asian univ                       |
| 655 | iyer        | as | new delhi  |                                        |
| 656 | mehata      | m  | new delhi  | delhi technol univ                     |
| 657 | milton      | md | new delhi  | univ delhi                             |
| 658 | mondal      | pc | new delhi  | univ delhi                             |
| 659 | mukhopadyay | p  | new delhi  |                                        |
| 660 | pandey      | ps | new delhi  | iit                                    |
| 661 | singh       | v  | new delhi  | univ delhi                             |
| 662 | hamilton    | ad | new haven  | ct, yale                               |
| 663 | breaker     | r  | new haven  | ct, yale                               |
| 664 | adams       | dm | new york   | columbia univ                          |
| 665 | avouris     | p  | new york   | ibm                                    |
| 666 | bancroft    | c  | new york   | mt sinai sch medicine                  |
| 667 | cornish     | vw | new york   | columbia univ                          |
| 668 | macdonald   | j  | new york   | columbia univ                          |
| 669 | sadelain    | m  | new york   | memorial sloan kettering cancer center |
| 670 | seeman      | n  | new york   | nyu                                    |
| 671 | stojanovic  | mn | new york   | columbia univ                          |
| 672 | wang        |    | new york   |                                        |
| 673 | kloxin      | am | newark     | de, univ delaware                      |
| 674 | kiick       | kl | newark     | dl, univ delaware                      |
| 675 | goni-moreno | a  | newcastle  |                                        |
| 676 | krasnogor   | n  | newcastle  |                                        |
| 677 | berggren    | m  | norrkoping | linkoping univ                         |
| 678 | hu          | sj | norrkoping | linkoping univ                         |

|     |                  |    |             |              |
|-----|------------------|----|-------------|--------------|
| 679 | smith            | bd | notre dame  | in           |
| 680 | alexander        | c  | nottingham  |              |
| 681 | russell          | na | nottingham  |              |
| 682 | magri            | dc | nova scotia | arcadia univ |
| 683 | brown            | gm | oak ridge   | tn           |
| 684 | okamoto          | h  | okayama     | okayama univ |
| 685 | puri             |    | ontario     |              |
| 686 | kolpashchikov    | dm | orlando     | fl           |
| 687 | gerasimova       | yv | orlando     | fl           |
| 688 | desouter-lecomte | m  | orsay       | univ paris   |
| 689 | akashi           | m  | osaka       | suita        |
| 690 | hirai            | t  | osaka       | toyonaka     |
| 691 | inoue            | j  | osaka       | suita        |
| 692 | nishimura        | t  | osaka       |              |
| 693 | ogawa            | t  | osaka       |              |
| 694 | zenkina          | o  | ottawa      |              |
| 695 | aldridge         | s  | oxford      |              |
| 696 | turberfield      | aj | oxford      |              |
| 697 | beer             | pd | oxford      |              |
| 698 | davis            | bg | oxford      |              |
| 699 | amatore          | c  | paris       | ens          |
| 700 | davidson         | eh | pasadena    | ca, caltech  |
| 701 | phillips         | r  | pasadena    | ca, caltech  |
| 702 | qian             | ll | pasadena    | ca, caltech  |
| 703 | smolke           | c  | pasadena    | ca, caltech  |
| 704 | winfree          | e  | pasadena    | ca, caltech  |
| 705 | tsitsilianis     | c  | patras      | univ patras  |
| 706 | luxami           | v  | pattiala    | thapar univ  |
| 707 | amendola         | v  | pavia       |              |
| 708 | pallavicini      | p  | pavia       |              |
| 709 | fabbrizzi        | l  | pavia       |              |
| 710 | gentili          | pl | perugia     |              |
| 711 | deiters          | a  | pittsburgh  |              |
| 712 | seeberger        | pl | potsdam     | germany      |
| 713 | bollella         | p  | potsdam     | ny           |
| 714 | katz             | e  | potsdam     | ny           |
| 715 | melman           | a  | potsdam     | ny           |
| 716 | minko            | s  | potsdam     | ny           |
| 717 | pita             | m  | potsdam     | ny           |
| 718 | privman          | v  | potsdam     | ny           |
| 719 | sokolov          | i  | potsdam     | ny           |
| 720 | novakova         | v  | prague      | charles univ |
| 721 | zimcik           | p  | prague      | charles univ |
| 722 | papenfort        | k  | princeton   | nj           |
| 723 | tavazoie         | s  | princeton   | nj           |
| 724 | weiss            | r  | princeton   | nj           |



|     |              |    |             |                            |
|-----|--------------|----|-------------|----------------------------|
| 725 | kikkeri      | r  | pune        |                            |
| 726 | thotiyl      | mo | pune        |                            |
| 727 | bourdouris   | bw | purdue      | in                         |
| 728 | mallick      | a  | purulia     | west bengal                |
| 729 | bi           | s  | qingdao     | qingdao univ               |
| 730 | ge           |    | qingdao     |                            |
| 731 | hun          | x  | qingdao     | qingdao univ sci technol   |
| 732 | li           | xm | qingdao     |                            |
| 733 | li           | f  | qingdao     | qingdao agric univ         |
| 734 | luo          | xl | qingdao     | qingdao univ sci technol   |
| 735 | wang         | zh | qingdao     |                            |
| 736 | wang         | xb | qingdao     | cas                        |
| 737 | wu           | w  | qingdao     | qingdao agric univ         |
| 738 | xia          | jf | qingdao     | qingdao univ               |
| 739 | xu           | yh | qingdao     | qingdao univ               |
| 740 | yang         | rq | qingdao     |                            |
| 741 | yang         | ql | qingdao     | qingdao agric univ         |
| 742 | zhang        | ss | qingdao     | qingdao univ sci technol   |
| 743 | zhang1       |    | qingdao     |                            |
| 744 | zhang2       |    | qingdao     |                            |
| 745 | liu          |    | qingdao?    |                            |
| 746 | gao          | fm | qinhuangdao | hebei                      |
| 747 | gu           | jm | qinhuangdao | hebei                      |
| 748 | liu          | sm | qinhuangdao | hebei, yanshan univ        |
| 749 | wen          | b  | qinhuangdao | hebei                      |
| 750 | guo          | xf | qiqihar     |                            |
| 751 | jia          | lh | qiqihar     |                            |
| 752 | kan          | w  | qiqihar     |                            |
| 753 | qu           | f  | qufu        | qufu normal univ, shandong |
| 754 | ren          | r  | qufu        | shandong                   |
| 755 | you          | jm | qufu        | qufu normal univ, shandong |
| 756 | deiters      | a  | raleigh     | nc                         |
| 757 | gu           | z  | raleigh     | nc, ncsu                   |
| 758 | ligler       | fs | raleigh     | nc, ncsu                   |
| 759 | bachelet     | i  | ramat gan   | bar ilan univ              |
| 760 | fixler       | d  | ramat gan   | bar ilan univ              |
| 761 | alon         | u  | rehovot     | wis                        |
| 762 | klajn        | r  | rehovot     | wis                        |
| 763 | lahav        | m  | rehovot     | wis                        |
| 764 | margulies    | d  | rehovot     | wis                        |
| 765 | mondal       | pc | rehovot     | wis                        |
| 766 | shanzer      | a  | rehovot     | wis                        |
| 767 | shapiro      | e  | rehovot     | wis                        |
| 768 | van der boom | m  | rehovot     | wis                        |
| 769 | cadiou       | c  | reims       |                            |
| 770 | lemercier    | g  | reims       |                            |

|     |               |     |                        |                                       |
|-----|---------------|-----|------------------------|---------------------------------------|
| 771 | fabre         | b   | rennes                 |                                       |
| 772 | loget         | g   | rennes                 |                                       |
| 773 | rigaut        | s   | rennes                 |                                       |
| 774 | bleris        | l   | richardson             | tx, ut dallas                         |
| 775 | tam           | tk  | richland               | wa                                    |
| 776 | birge         | r   | rochester              | ny                                    |
| 777 | guo           | cl  | rochester              | ny                                    |
| 778 | ogihara       | m   | rochester              | ny                                    |
| 779 | ray           | a   | rochester              | ny                                    |
| 780 | frasconi      | m   | rome                   |                                       |
| 781 | mazzei        | f   | rome                   |                                       |
| 782 | ricci         | f   | rome                   |                                       |
| 783 | ahmed         | n   | roorkee                | iit                                   |
| 784 | ghosh         | k   | roorkee                |                                       |
| 785 | gupta         | vk  | roorkee                | iit                                   |
| 786 | kar           | p   | roorkee                |                                       |
| 787 | singh         | ak  | roorkee                |                                       |
| 788 | thakur        | a   | rourkela               | odisha                                |
| 789 | patel         | s   | rourkela               | nat inst technol rourkela             |
| 790 | singh         | n   | rupnagar               | punjab, iit                           |
| 791 | schumann      | a   | rszow                  | poland, univ inf technol management   |
| 792 | jung          | g   | saarbrucken            |                                       |
| 793 | schneider     | hj  | saarbrucken            |                                       |
| 794 | inoue         | t   | saitama                | presto                                |
| 795 | almutairi     | a   | san diego              | ca, ucsd                              |
| 796 | hwa           | t   | san diego              | ca, ucsd                              |
| 797 | wang          | j   | san diego              | ca, ucsd                              |
| 798 | voigt         | ca  | san francisco          | ca                                    |
| 799 | heinrich      | aj  | san jose               | ca                                    |
| 800 | bazan         | g   | santa barbara          | ca                                    |
| 801 | plaxco        | k   | santa barbara          | ca                                    |
| 802 | matalobos     | js  | santiago de compostela |                                       |
| 803 | vasquez-lopez | m   | santiago de compostela |                                       |
| 804 | begum         | na  | santiniketan           |                                       |
| 805 | araki         | k   | sao paulo              |                                       |
| 806 | toma          | he  | sao paulo              |                                       |
| 807 | araki         |     | sapporo                |                                       |
| 808 | miyashita     |     | sapporo                |                                       |
| 809 | suzuki        |     | sapporo                |                                       |
| 810 | steer         | rp  | saskatoon              |                                       |
| 811 | wettig        | sd  | saskatoon              |                                       |
| 812 | yeow          | ekl | saskatoon              |                                       |
| 813 | deforest      | ca  | seattle                | wa, univ washington                   |
| 814 | srivastava    | s   | seattle                | wa, fred hutchinson cancer res centre |
| 815 | seelig        | g   | seattle                | wa, univ washington                   |
| 816 | akutagawa     | t   | sendai                 | tohoku uni                            |

|     |           |    |          |                                               |
|-----|-----------|----|----------|-----------------------------------------------|
| 817 | ito       | o  | sendai   | tohoku univ                                   |
| 818 | matsui    | j  | sendai   | tohoku univ                                   |
| 819 | miyashita | t  | sendai   | tohoku univ                                   |
| 820 | chang     | sk | seoul    | chung-ang univ                                |
| 821 | cheon     | j  | seoul    | yonsei univ                                   |
| 822 | choi      | dh | seoul    | korea univ                                    |
| 823 | jang      | wg | seoul    |                                               |
| 824 | kim       | jm | seoul    | hanyang univ                                  |
| 825 | kim       | jb | seoul    | korea univ                                    |
| 826 | kim       | ca | seoul    | nust                                          |
| 827 | lee       | ym | seoul    | hanyang univ                                  |
| 828 | nam       | jm | seoul    | seoul natl univ                               |
| 829 | oh        | mk | seoul    | korea univ                                    |
| 830 | yoon      | jy | seoul    | ewha womens univ                              |
| 831 | zhang     |    | seoul    |                                               |
| 832 | hong      | ji | seoul    | seoul natl univ                               |
| 833 | ros       | a  | seville  |                                               |
| 834 | cheng     | ty | shanghai | shanghai normal univ                          |
| 835 | chen      | wb | shanghai | shanghai univ elec power                      |
| 836 | chen      | gs | shanghai | fudan univ                                    |
| 837 | cheng     | gf | shanghai | east china normal univ                        |
| 838 | dong      |    | shanghai |                                               |
| 839 | fan       | ch | shanghai | shanghai jiaotong univ, shanghai inst appl ph |
| 840 | feng      | cl | shanghai | shanghai jiaotong univ                        |
| 841 | feng      | c  | shanghai | shanghai univ                                 |
| 842 | gao       | hw | shanghai | tonji univ                                    |
| 843 | guo       | zq | shanghai | ecust                                         |
| 844 | he        | xp | shanghai | ecust                                         |
| 845 | huang     | ss | shanghai |                                               |
| 846 | huang     | cs | shanghai | shanghai normal univ                          |
| 847 | jiang     |    | shanghai |                                               |
| 848 | jin       |    | shanghai |                                               |
| 849 | li        | l  | shanghai | east china normal univ                        |
| 850 | li        | yp | shanghai | shanghai inst materia medica                  |
| 851 | li        | t  | shanghai | shanghai jiaotong univ                        |
| 852 | liu       |    | shanghai |                                               |
| 853 | lu        | n  | shanghai | shanghai univ eng sci                         |
| 854 | ma        |    | shanghai |                                               |
| 855 | pei       |    | shanghai |                                               |
| 856 | qian      | xh | shanghai |                                               |
| 857 | qiu       |    | shanghai |                                               |
| 858 | shen      | yj | shanghai |                                               |
| 859 | shi       | s  | shanghai | tongji univ                                   |
| 860 | song      | sp | shanghai | cas shanghai inst appl phys                   |
| 861 | tang      | zs | shanghai | shanghai key lab stomatology                  |
| 862 | tian      | h  | shanghai |                                               |

|     |           |     |           |                              |
|-----|-----------|-----|-----------|------------------------------|
| 863 | wang      | cc  | shanghai  | fudan univ                   |
| 864 | wang      | cy  | shanghai  | ecust                        |
| 865 | wang      | pf  | shanghai  | shanghai jiaotong univ       |
| 866 | wang      | lh  | shanghai  | shanghai inst appl phys      |
| 867 | wu        |     | shanghai  |                              |
| 868 | xie       | ys  | shanghai  | ecust                        |
| 869 | xu        | l   | shanghai  |                              |
| 870 | xu        | za  | shanghai  | east china normal univ       |
| 871 | yan       | b   | shanghai  | tongji univ                  |
| 872 | yao       | tm  | shanghai  | tongji univ                  |
| 873 | ye        | bc  | shanghai  | ecust                        |
| 874 | yin       | ch  | shanghai  | fudan univ                   |
| 875 | yu        |     | shanghai  |                              |
| 876 | yu        | hj  | shanghai  | shanghai inst materia medica |
| 877 | yuan      | yz  | shanghai  | ecust                        |
| 878 | zhang     | jj  | shanghai  | ecust                        |
| 879 | zhang     | w   | shanghai  | east china normal univ       |
| 880 | zhang     | m   | shanghai  | shanghai univ eng sci        |
| 881 | zhu       | cf  | shanghai  | fudan univ                   |
| 882 | zhu       | ly  | shanghai  | ecust                        |
| 883 | zhu       | cf  | shanghai  | fudan, zhongshan hosp        |
| 884 | zhu       | xl  | shanghai  | shanghai univ                |
| 885 | zou       | q   | shanghai  | shanghai univ elec power     |
| 886 | zuo       | xl  | shanghai  | shanghai inst appl phys      |
| 887 | li        | fy  | shanghai  | fudan univ                   |
| 888 | jones     | ral | sheffield |                              |
| 889 | armes     | sp  | sheffield |                              |
| 890 | chen      | xw  | shenyang  |                              |
| 891 | he        | rh  | shenyang  |                              |
| 892 | sun       | t   | shenyang  |                              |
| 893 | wang      | rh  | shenyang  |                              |
| 894 | wang      | jh  | shenyang  |                              |
| 895 | cai       | zm  | shenzhen  | shenzhen univ                |
| 896 | huang     | wr  | shenzhen  | shenzhen univ                |
| 897 | jin       | f   | shenzhen  | shenzhen inst adv technol    |
| 898 | liu       | yz  | shenzhen  | shenzhen univ                |
| 899 | ni        | l   | shenzhen  | shenzhen inst adv technol    |
| 900 | qu        | jl  | shenzhen  | shenzhen univ                |
| 901 | song      | j   | shenzhen  | shenzhen univ                |
| 902 | wong      | wy  | shenzhen  | shenzhen univ                |
| 903 | zhang     |     | shenzhen  |                              |
| 904 | ihmels    | h   | siegen    |                              |
| 905 | schmittel | m   | siegen    |                              |
| 906 | chen      | xd  | singapore | nanyang univ                 |
| 907 | chin      | w   | singapore |                              |
| 908 | kang      | et  | singapore | nat univ singapore           |

|     |            |    |                |                                           |
|-----|------------|----|----------------|-------------------------------------------|
| 909 | liu        | xg | singapore      | singapore univ technol design             |
| 910 | rout       | b  | singapore      |                                           |
| 911 | selvan     | st | singapore      | nat univ singapore                        |
| 912 | soe        | wh | singapore      |                                           |
| 913 | soh        | sl | singapore      |                                           |
| 914 | su         | xd | singapore      | astar                                     |
| 915 | xiong      | qh | singapore      | nanyang univ                              |
| 916 | zhao       | yl | singapore      | nanyang tech univ                         |
| 917 | bojinov    | vb | sofia          |                                           |
| 918 | zauner     | kp | southampton    |                                           |
| 919 | philp      | d  | st andrews     |                                           |
| 920 | endy       | d  | stanford       | ca                                        |
| 921 | bogyo      | m  | stanford       | school of med                             |
| 922 | deisseroth | k  | stanford       | ca                                        |
| 923 | li         | x  | stockholm      | kth royal inst technol                    |
| 924 | sun        |    | stockholm?     |                                           |
| 925 | bolze      | f  | strasbourg     |                                           |
| 926 | giuseppone | n  | strasbourg     |                                           |
| 927 | lehn       | jm | strasbourg     |                                           |
| 928 | lutz       | jf | strasbourg     | inst charles sadron                       |
| 929 | ziessel    | r  | strasbourg     |                                           |
| 930 | macdonald  | j  | sunshine coast | sunshine coast univ, queensland           |
| 931 | shah       | ba | surat          |                                           |
| 932 | trivedi    | dr | surathkal      |                                           |
| 933 | lee        | ds | suwon          | sungkyunkwan univ                         |
| 934 | park       | sh | suwon          | sungkyunkwan univ                         |
| 935 | dong       | b  | suzhou         |                                           |
| 936 | pei        | rj | suzhou         |                                           |
| 937 | du         | yk | suzhou         |                                           |
| 938 | ma         | n  | suzhou         | soochow univ                              |
| 939 | miao       | p  | suzhou         | suzhou inst biomed eng technol            |
| 940 | shi        | ex | suzhou         |                                           |
| 941 | wang       | qb | suzhou         | suzhou inst nano                          |
| 942 | yan        | rh | suzhou         | suzhou sci technol town hospital          |
| 943 | zhong      | zy | suzhou         |                                           |
| 944 | zhou       | c  | suzhou         | suzhou inst nano                          |
| 945 | kepert     | c  | sydney         |                                           |
| 946 | new        | ej | sydney         |                                           |
| 947 | gooding    | jj | sydney         | unsw                                      |
| 948 | churchill  | dg | taejon         | kaist                                     |
| 949 | park       | hg | taejon         | kaist                                     |
| 950 | chuang     | mc | taichung       | taiwan, tunghai univ and natl taiwan univ |
| 951 | chang      | ht | taipei         |                                           |
| 952 | chiu       | sh | taipei         | natl taiwan univ                          |
| 953 | ho         | ja | taipei         | natl taiwan univ                          |
| 954 | lin        | kc | taipei         | natl taiwan univ                          |

|     |                    |     |                    |                          |
|-----|--------------------|-----|--------------------|--------------------------|
| 955 | yang               | tck | taipei             |                          |
| 956 | chou               |     | taiwan             |                          |
| 957 | dong               | c   | taiyuan            | shanxi                   |
| 958 | gong               | xj  | taiyuan            | shanxi                   |
| 959 | guo                | w   | taiyuan            | shanxi                   |
| 960 | jin                |     | taiyuan            | shanxi                   |
| 961 | yin                | cx  | taiyuan            | shanxi                   |
| 962 | han                | dm  | taizhou            | jiaojiang, jiangsu       |
| 963 | zhu                | l   | tallahassee        | fl                       |
| 964 | arabahmadi         | r   | tehran             | payame noor univ, iran   |
| 965 | azadbakht<br>khan- | r   | tehran             | payame noor univ, iran   |
| 966 | mohammadi          |     | tehran             |                          |
| 967 | shokri             | aa  | tehran             |                          |
| 968 | tavallali          | h   | tehran             | payame noor univ, iran   |
| 969 | rabani             | e   | tel aviv           |                          |
| 970 | shabat             | d   | tel aviv           |                          |
| 971 | green              | aa  | tempe              | az, arizona state univ   |
| 972 | gust               | d   | tempe              | az                       |
| 973 | li                 | w   | tempe              | az                       |
| 974 | liu                | y   | tempe              | az                       |
| 975 | moore              | t   | tempe              | az                       |
| 976 | yan                | h   | tempe              | az                       |
| 977 | zhang              | c   | tempe              | az                       |
| 978 | velmathi           | s   | thiruchirappalli   | nat inst technol         |
| 979 | ajayaghosh         | a   | thiruvananthapuram |                          |
| 980 | sherin             | dr  | thiruvananthapuram |                          |
| 981 | bu                 | xh  | tianjin            | nankai univ              |
| 982 | dong               | sj  | tianjin            | tianjin univ sci technol |
| 983 | he                 | s   | tianjin            |                          |
| 984 | kong               | dm  | tianjin            | nankai univ              |
| 985 | liu                | yq  | tianjin            |                          |
| 986 | tang               | an  | tianjin            | nankai univ              |
| 987 | wang               | s   | tianjin            |                          |
| 988 | xi                 | z   | tianjin            | nankai univ              |
| 989 | yan                | xp  | tianjin            | nankai univ              |
| 990 | zeng               | xs  | tianjin            |                          |
| 991 | zhu                |     | tianjin            |                          |
| 992 | zou                | q   | tianjin            | tianjin univ             |
| 993 | sreekanth          | a   | tiruchirapalli     |                          |
| 994 | balasurbamanian    | k   | tiruchirapalli     | nat inst technol         |
| 995 | kinbara            | k   | tokyo              | univ tokyo               |
| 996 | aida               | t   | tokyo              | univ tokyo               |
| 997 | fujita             | m   | tokyo              | univ tokyo               |
| 998 | haga               | ma  | tokyo              | chuo univ                |
| 999 | kagechika          | h   | tokyo              | tokyo med dental univ    |

|      |                |    |                  |                                 |
|------|----------------|----|------------------|---------------------------------|
| 1000 | nojima         | t  | tokyo            | univ tokyo                      |
| 1001 | shionoya       | m  | tokyo            | univ tokyo                      |
| 1002 | suzuki         | k  | tokyo            | keio univ                       |
| 1003 | tanaka         | k  | tokyo            | seikei univ                     |
| 1004 | uchiyama       | s  | tokyo            | univ tokyo                      |
| 1005 | mihara         |    | tokyo?           |                                 |
| 1006 | langa          | f  | toledo           | univ castilla la mancha         |
| 1007 | afrasiabi      | r  | toronto          |                                 |
| 1008 | gunning        |    | toronto          |                                 |
| 1009 | impellizzeri   | s  | toronto          | ryerson univ                    |
| 1010 | scholes        | g  | toronto          |                                 |
| 1011 | hussain        | sa | tripura          |                                 |
| 1012 | stokke         | bt | trondheim        |                                 |
| 1013 | ariga          | k  | tsukuba          |                                 |
| 1014 | bandyopadhyay  | a  | tsukuba          |                                 |
| 1015 | ghosh          | s  | tsukuba          |                                 |
| 1016 | hill           | jp | tsukuba          |                                 |
| 1017 | nabeshima      | t  | tsukuba          |                                 |
| 1018 | nagasaki       | y  | tsukuba          | ibaraki                         |
| 1019 | yamamura       | m  | tsukuba          |                                 |
| 1020 | lee            | hi | ulsan            | ulsan univ                      |
| 1021 | sabouri        | n  | umea             |                                 |
| 1022 | chorell        | e  | umea             |                                 |
| 1023 | sen            | a  | university park  | pa, pennsylvania state univ     |
| 1024 | landegren      | u  | uppsala          |                                 |
| 1025 | liu            | jw | urbana           | il, beckman ctr adv sci technol |
| 1026 | lu             | y  | urbana-champaign | il                              |
| 1027 | moore          | js | urbana-champaign | il                              |
| 1028 | jia            |    | urumqui          |                                 |
| 1029 | costero        | a  | valencia         |                                 |
| 1030 | covera         |    | valencia         |                                 |
| 1031 | garcia-espana  | e  | valencia         |                                 |
| 1032 | martinez-manez | r  | valencia         |                                 |
| 1033 | miranda        | m  | valencia         |                                 |
| 1034 | ramirez        | p  | valencia         |                                 |
| 1035 | algar          | wr | vancouver        | univ brit columbia              |
| 1036 | upadhyay       | kk | varanasi         | banaras hindu univ              |
| 1037 | hasan          | sh | varanasi         | bhu, iit                        |
| 1038 | kumari         | n  | varanasi         |                                 |
| 1039 | mishra         | l  | varanasi         |                                 |
| 1040 | misra          | a  | varanasi         |                                 |
| 1041 | pandey         | ds | varanasi         | banaras hindu univ              |
| 1042 | upadhyay       | kk | varanasi         |                                 |
| 1043 | sykes          | ag | vermillion       | sd                              |
| 1044 | papadopoulos   | c  | victoria         | bc canada                       |
| 1045 | tamulis        | a  | vilnius          |                                 |

|      |           |    |                |                                      |
|------|-----------|----|----------------|--------------------------------------|
| 1046 | kanayama  | n  | wako           | saitama                              |
| 1047 | jurczak   | j  | warsaw         |                                      |
| 1048 | medintz   | il | washington     | dc                                   |
| 1049 | huang     | xb | wenzhou        | zhejiang                             |
| 1050 | peppas    | na | west lafayette | in, purdue                           |
| 1051 | d'souza   | f  | wichita        |                                      |
| 1052 | nemykin   | vn | winnipeg       | univ manitoba                        |
| 1053 | jang      | do | wonju          | yonsei univ                          |
| 1054 | samoc     | m  | wroclaw        |                                      |
| 1055 | cai       | p  | wuhan          | wuhan univ                           |
| 1056 | chen      | f  | wuhan          | huazhong univ sci technol            |
| 1057 | hu        | jm | wuhan          |                                      |
| 1058 | pan       | lq | wuhan          | huazhong univ sci technol            |
| 1059 | pei       | rj | wuhan          |                                      |
| 1060 | song      | t  | wuhan          | huazhong univ sci technol+D1011      |
| 1061 | wang      | f  | wuhan          | wuhan univ                           |
| 1062 | xia       | f  | wuhan          |                                      |
| 1063 | xiao      | yx | wuhan          | ministry educ key lab combi biosynth |
| 1064 | yang      | cl | wuhan          | wuhan univ                           |
| 1065 | zhang     | xz | wuhan          | wuhan univ                           |
| 1066 | zhou      | xd | wuhan          |                                      |
| 1067 | zhou      | x  | wuhan          | wuhan univ                           |
| 1068 | wang      | gf | wuhu           | anhui normal univ                    |
| 1069 | jiang     | yb | xiamen         |                                      |
| 1070 | ju        | y  | xiamen         |                                      |
| 1071 | luo       | gg | xiamen         | huaqiao univ                         |
| 1072 | bian      | lj | xian           | northwest univ                       |
| 1073 | chen      | x  | xian           | xian jiaotong univ                   |
| 1074 | dong      | yf | xian           | shanxi normal                        |
| 1075 | fang      | y  | xian           |                                      |
| 1076 | guo       | bj | xian           | shaanxi normal univ                  |
| 1077 | huang     | w  | xian           | northwestern polytech univ           |
| 1078 | li        | j  | xian           |                                      |
| 1079 | li        | mh | xian           | shanxi normal                        |
| 1080 | qi        | hl | xian           | shaanxi normal univ                  |
| 1081 | liu       | ym | xinxiang       | henan normal univ                    |
| 1082 | wang      | jj | xinxiang       | henan normal univ                    |
| 1083 | zhang     | h  | xinxiang       | henan normal univ                    |
| 1084 | wang      | jl | yangling       | shaanxi                              |
| 1085 | chen      | lx | yantai         | shandong, near qingdao               |
| 1086 | yang      | cl | yantai         | shandong, near qingdao, ludong univ  |
| 1087 | tomizaki  | ky | yokohama       | tokyo inst technol                   |
| 1088 | maruyama  | a  | yokohama       | tokyo inst technol                   |
| 1089 | dunn      | ke | york           | uk                                   |
| 1090 | yuk       | sh | yusung         | korea res inst chem technol          |
| 1091 | diaz diaz | d  | zaragoza       |                                      |



|      |             |    |           |                                      |
|------|-------------|----|-----------|--------------------------------------|
| 1092 | lin         | hb | zhangzhou | minnan normal univ, fujian           |
| 1093 | li          | k  | zhengzhou | henan, zhengzhou univ                |
| 1094 | wang        | yf | zhengzhou | henan                                |
| 1095 | zhang       | xc | zhengzhou | henan, zhengzhou univ light industry |
| 1096 | zhang       | pk | zhengzhou | henan, zhengzhou univ                |
| 1097 | zhang       | jy | zhengzhou |                                      |
| 1098 | miao        | wg | zhenjiang | guangdong                            |
| 1099 | li          | qh | zibo      | shandong univ technol                |
| 1100 | benenson    | y  | zurich    | eth                                  |
| 1101 | diederich   | f  | zurich    | eth                                  |
| 1102 | fussenegger | m  | zurich    |                                      |
| 1103 | marchisio   | ma | zurich    | eth                                  |
| 1104 | schluter    | ad | zurich    |                                      |

Table S2. List of sources of sensors/switches designed or understood on the basis of competing fluorescence and PET (surname, initials, city, institute).

|    |                  |    |             |                           |
|----|------------------|----|-------------|---------------------------|
| 1  | callan           | jf | aberdeen    |                           |
| 2  | plater           | j  | aberdeen    |                           |
| 3  | english          |    | adelaide    |                           |
| 4  | foo              |    | adelaide    |                           |
| 5  | wainwright       | k  | adelaide    | flinders univ             |
| 6  | menon            |    | ahmedabad   |                           |
| 7  | ganguly          |    | ahmedabad?  |                           |
| 8  | chitta           | r  | ajmer       | central univ rajasthan    |
| 9  | garzon           | a  | albacete    | univ castilla la mancha   |
| 10 | garcia-martinez  | jc | albacete    | univ castilla la mancha   |
| 11 | wang             | w  | albuquerque | univ nm                   |
| 12 | kaur             | p  | amritsar    | guru nanak dev univ       |
| 13 | kumar            |    | amritsar    | guru nanak dev univ       |
| 14 | singh            | k  | amritsar    | guru nanak dev univ       |
| 15 | verhoeven        | j  | amsterdam   |                           |
| 16 | akkaya           | eu | ankara      | mtu and bilkent univ      |
| 17 | garner           | al | ann arbor   | univ michigan             |
| 18 | liu              | l  | anyang      | henan, anyang normal univ |
| 19 | xia              | n  | anyang      | henan, anyang normal univ |
| 20 | rudkevich        | d  | arlington   | tx                        |
| 21 | thapa            | p  | arlington   | tx, univ texas arlington  |
| 22 | petsalakis       | id | athens      | nat hellen res found      |
| 23 | theodorakopoulos |    | athens      |                           |
| 24 | tzeli            | d  | athens      | nat hellen res found      |
| 25 | fahrni           | cj | atlanta     | ga, gatech                |
| 26 | lucchi           | nw | atlanta     | ga,cdcpc                  |

|    |                       |    |             |                                  |
|----|-----------------------|----|-------------|----------------------------------|
| 27 | perry                 | jw | atlanta     | ga, gatech                       |
| 28 | anslyn<br>munoz de la | ev | austin      | tx                               |
| 29 | pena                  |    | badajoz     | extremadura                      |
| 30 | lakowicz              | j  | baltimore   | md                               |
| 31 | mugesh                | g  | bangalore   | indian inst sci                  |
| 32 | thiagar               | p  | bangalore   | indian inst sci                  |
| 33 | rashatasakhon         | p  | bangkok     | chulalongkorn univ               |
| 34 | li                    | w  | baoding     | hebei univ                       |
| 35 | li                    | xl | baoding     | hebei univ                       |
| 36 | gallardo              |    | barcelona   |                                  |
| 37 | guirado               | g  | barcelona   |                                  |
| 38 | hernando              | j  | barcelona   |                                  |
| 39 | escriche              |    | barcelona?  |                                  |
| 40 | das                   | d  | bardhaman   | uni burdwan                      |
| 41 | reymond               | j  | basel       |                                  |
| 42 | bull                  | s  | bath        |                                  |
| 43 | james                 | td | bath        |                                  |
| 44 | marken                | f  | bath        |                                  |
| 45 | ji                    | hf | baton rouge | la                               |
| 46 | mccarley              | rl | baton rouge |                                  |
| 47 | chen                  | y  | beijing     | tech inst phys chem, cas         |
| 48 | duan                  | pf | beijing     | ncnst                            |
| 49 | fang                  |    | beijing     |                                  |
| 50 | fu                    |    | beijing     |                                  |
| 51 | he                    | m  | beijing     | tsinghua univ                    |
| 52 | hu                    | hy | beijing     | chinese acad med sci             |
| 53 | jiang                 | jz | beijing     | univ sci technol beijing         |
| 54 | jing                  | j  | beijing     | beijing inst technol             |
| 55 | li                    | y  | beijing     | cas tech inst phys chem          |
| 56 | lin                   | cg | beijing     | beijing univ chem technol        |
| 57 | liu                   | wm | beijing     | cas tech inst phys chem          |
| 58 | lou                   | xh | beijing     | tsinghua univ                    |
| 59 | ma                    |    | beijing     |                                  |
| 60 | niu                   |    | beijing     |                                  |
| 61 | ouyang                | j  | beijing     | beijing normal univ              |
| 62 | shi                   | dy | beijing     | ucas                             |
| 63 | song                  | yf | beijing     | beijing univ chem technol        |
| 64 | tang                  | yd | beijing     | chinese acad med sci peking unio |
| 65 | wang                  | jy | beijing     |                                  |
| 66 | wang1                 |    | beijing     |                                  |
| 67 | wang2                 |    | beijing     |                                  |
| 68 | wu                    |    | beijing     |                                  |

|     |               |    |             |                                  |
|-----|---------------|----|-------------|----------------------------------|
| 69  | xu            | p  | beijing     | peking univ                      |
| 70  | yang1         | xr | beijing     | ucas                             |
| 71  | yang2         |    | beijing     |                                  |
| 72  | yang3         | sx | beijing     | beijing technol business univ    |
| 73  | yang4         | r  | beijing     | beijing univ chem technol        |
| 74  | yao           |    | beijing     |                                  |
| 75  | yin           | mz | beijing     | buct                             |
| 76  | yuan          | jy | beijing     | tsinghua univ                    |
| 77  | zeng          | y  | beijing     | cas tech inst phys chem          |
| 78  | zhang1        | dq | beijing     | cas                              |
| 79  | zhang2        | qy | beijing     | chinese acad med sci & peking un |
| 80  | zhang3        | dp | beijing     | cas                              |
| 81  | zhang4        | jl | beijing     | peking univ                      |
| 82  | zhang5        | hy | beijing     | tipc, cas                        |
| 83  | zhang6        | cj | beijing     | peking union med coll chinese ac |
| 84  | de silva      | ap | belfast     | queens univ                      |
| 85  | mccoy         | cp | belfast     | queens univ                      |
| 86  | bhattacharya  | s  | bengaluru   | indian inst sci                  |
| 87  | maitra        | u  | bengaluru   |                                  |
| 88  | yelamaggad    | cv | bengaluru   | cens                             |
| 89  | bertozzi      | cr | berkeley    |                                  |
| 90  | chang         | cj | berkeley    |                                  |
| 91  | milller       | e  | berkeley    |                                  |
| 92  | resch-genger  | u  | berlin      | bam                              |
| 93  | rettig        | w  | berlin      | humboldt univ                    |
| 94  | rurack        | k  | berlin      | bam                              |
| 95  | schalley      | c  | berlin      |                                  |
| 96  | chen          | xy | bethesda    | md, nih                          |
| 97  | das           | a  | bhavnagar   | salt marine inst                 |
| 98  | ganguly       |    | bhavnagar   | salt marine inst                 |
| 99  | sauer         | m  | bielefeld   |                                  |
| 100 | sevinç        | g  | bilecik     | bilecik Şeyh edebali univ        |
| 101 | stoddart      | jf | birmingham  | uk                               |
| 102 | pu            | l  | blacksburg  | va                               |
| 103 | aron          |    | bloomington | in                               |
| 104 | balzani       | v  | bologna     |                                  |
| 105 | barigelletti  | f  | bologna     | frae                             |
| 106 | flamigni      | l  | bologna     |                                  |
| 107 | prodi         | l  | bologna     |                                  |
| 108 | elsinghorst   | pw | bonn        | univ bonn                        |
| 109 | bouas-laurent | h  | bordeaux    |                                  |
| 110 | desvergne     | jp | bordeaux    |                                  |
| 111 | fages         | f  | bordeaux    |                                  |

|     |             |     |            |                                 |
|-----|-------------|-----|------------|---------------------------------|
| 112 | lapouyade   | r   | bordeaux   |                                 |
| 113 | mcclenaghan | nd  | bordeaux   |                                 |
| 114 | tisovsky    | p   | bratislava | comenius univ                   |
| 115 | nau         | w   | bremen     |                                 |
| 116 | morawetz    | h   | brooklyn   | ny                              |
| 117 | huzthy      | p   | budapest   | budapest univ technol economics |
| 118 | kele        | p   | budapest   |                                 |
| 119 | kotschky    |     | budapest   |                                 |
| 120 | kubinyi     | m   | budapest   | budapest univ technol economics |
| 121 | leray       | i   | cachan     | ens                             |
| 122 | meallet     | r   | cachan     |                                 |
| 123 | miomandre   | f   | cachan     | ens                             |
| 124 | valeur      | b   | cachan     | ens                             |
| 125 | lippolis    |     | cagliari   |                                 |
| 126 | arunumar    | c   | calicut    | nit calicut                     |
| 127 | vasudevan   | s   | calicut    | nat inst technol calicut        |
| 128 | hall        |     | cambridge  | uk                              |
| 129 | spring      | dr  | cambridge  | uk                              |
| 130 | lippard     | sj  | cambridge  | ma, mit                         |
| 131 | van voorhis | t   | cambridge  | ma, mit                         |
| 132 | algi        |     | canakkale  | turkey                          |
| 133 | selinger    | b   | canberra   |                                 |
| 134 | dyer        | dj  | carbondale | il                              |
| 135 | mccarroll   | me  | carbondale | il                              |
| 136 | wang        | lc  | carbondale | il                              |
| 137 | galindo     | f   | castellon  |                                 |
| 138 | luis        | sv  | castellon  |                                 |
| 139 | kaur        | uan | chandigarh | panjab univ                     |
| 140 | feng        | gd  | changchun  | jilin univ                      |
| 141 | huan        |     | changchun  |                                 |
| 142 | lou         | bh  | changchun  | changchun ias, cas, jilin       |
| 143 | su          | zm  | changchun  | changchun UST/northeast norma   |
| 144 | wang        | xl  | changchun  | changchun UST/northeast norma   |
| 145 | xia         |     | changchun  |                                 |
| 146 | xie         | zg  | changchun  | changchun inst appl chem, cas   |
| 147 | xu          | gb  | changchun  | changchun ias, cas              |
| 148 | yang        | xr  | changchun  | ciac                            |
| 149 | zhang1      | sxa | changchun  | jilin univ                      |
| 150 | zhang2      | ym  | changchun  | jilin univ                      |
| 151 | zhao        | q   | changchun  | jilin univ                      |
| 152 | gong        | fc  | changsha   | changsha univ sci technol       |
| 153 | li          | ht  | changsha   | hunan normal univ               |
| 154 | lin         |     | changsha   |                                 |

|     |                |     |                 |                           |
|-----|----------------|-----|-----------------|---------------------------|
| 155 | ma             | cb  | changsha        | central south univ        |
| 156 | song           | xz  | changsha        | central south univ        |
| 157 | wang           | gf  | changsha        | hunan univ                |
| 158 | yu             |     | changsha        |                           |
| 159 | yuan           |     | changsha        |                           |
| 160 | zeng           | wb  | changsha        | central south univ        |
| 161 | zhang          | xb  | changsha        |                           |
| 162 | su             | f   | changzhi        | changzhi univ             |
| 163 | demas          | jn  | charlottesville | va                        |
| 164 | pu             | l   | charlottesville | va                        |
| 165 | kataev         | ea  | chemnitz        | tech univ chemnitz        |
| 166 | du             | j   | chengdu         | sichuan univ              |
| 167 | lv             | y   | chengdu         | sichuan univ              |
| 168 | peng           | y   | chengdu         | southwest jiaotong univ   |
| 169 | wang           | yw  | chengdu         | southwest jiaotong univ   |
| 170 | you            |     | chengdu         |                           |
| 171 | yu1            | ss  | chengdu         |                           |
| 172 | yu2            | xq  | chengdu         |                           |
| 173 | ramamurthy     |     | chennai         |                           |
| 174 | yang           | nc  | chicago         |                           |
| 175 | kruger         | p   | christchurch    | nz                        |
| 176 | park           | sy  | chungju         | korea natl univ transport |
| 177 | in             | i   | chungju         | korea natl univ transport |
| 178 | pearson        |     | cleveland       | oh                        |
| 179 | nandhakumar    | r   | coimbatore      | karunya inst technol sci  |
| 180 | selvakumar     | pm  | coimbatore      | karunya univ              |
| 181 | de costa       | mdp | colombo         |                           |
| 182 | de silva       | ap  | colombo         |                           |
| 183 | czarnik        | aw  | columbus        | oh                        |
| 184 | kilsa          |     | copenhagen      |                           |
| 185 | laursen        | bw  | copenhagen      |                           |
| 186 | nielsen        |     | copenhagen      |                           |
| 187 | sorensen       | tj  | copenhagen      |                           |
| 188 | dmitriev       |     | cork            |                           |
| 189 | coutsolelos    | ag  | crete           | univ crete                |
| 190 | katerinopoulos |     | crete           |                           |
| 191 | kim            | hs  | daegu           | kyungpook national univ   |
| 192 | kim            | hs  | daegu           | kyungpook natl univ       |
| 193 | churchill      | dg  | daejeon         | kaist                     |
| 194 | lee            | ts  | daejeon         | chungnam natl univ        |
| 195 | son            | ya  | daejeon         | chungnam natl univ        |
| 196 | yoon           | mj  | daejeon         | chungnam natl univ        |
| 197 | song           | ya  | daejeon         | chungnam natl univ        |

|     |                |     |              |                                      |
|-----|----------------|-----|--------------|--------------------------------------|
| 198 | chu            | ts  | dalian       | dalian inst chem phys                |
| 199 | cui            | jn  | dalian       |                                      |
| 200 | duan           | cy  | dalian       | dalian univ technol                  |
| 201 | fan            | jl  | dalian       | dalian univ technol                  |
| 202 | fan            | hj  | dalian       | dalian inst chem phys                |
| 203 | ge             | gb  | dalian       | dalian inst chem phys                |
| 204 | guo            | hm  | dalian       |                                      |
| 205 | han            |     | dalian       |                                      |
| 206 | han            | kl  | dalian       | dalian inst chem phys                |
| 207 | liu            | l   | dalian       | dalian inst chem phys                |
| 208 | liu            | jy  | dalian       | dalian inst chem phys                |
| 209 | liu            | fy  | dalian       | dalian univ technol                  |
| 210 | peng           | xj  | dalian       |                                      |
| 211 | piao           | hl  | dalian       | dalian inst chem phys                |
| 212 | qian           | xh  | dalian       |                                      |
| 213 | song           | b   | dalian       | dalian univ technol                  |
| 214 | xu             | zc  | dalian       | dalian inst chem phys                |
| 215 | yuan           |     | dalian       |                                      |
| 216 | zhang          | zc  | dalian       | dalian univ technol                  |
| 217 | zhao           | jz  | dalian       |                                      |
| 218 | zeng           |     | dalian?      |                                      |
| 219 | li             | wh  | dallas       | tx                                   |
| 220 | plenio         | h   | darmstadt    | tu darmstadt                         |
| 221 | vanderkooi     | g   | dekalb       | il, northern illinois univ           |
| 222 | jager          | w   | delft        |                                      |
| 223 | milton         |     | delhi        |                                      |
| 224 | sarkar         | a   | delhi        | india innovation res centre          |
| 225 | d'souza        | f   | denton       | univ north texas                     |
| 226 | evans          | rc  | dublin       | tcd                                  |
| 227 | gunnlaugsson   | t   | dublin       | tcd                                  |
| 228 | kruger         | p   | dublin       | tcd                                  |
| 229 | martínez-calvo | m   | dublin       | univ dublin                          |
| 230 | o'shea         | d   | dublin       | ucd                                  |
| 231 | parker         | d   | durham       |                                      |
| 232 | williams       | jag | durham       |                                      |
| 233 | müller         | tjj | düsseldorf   | heinrich-heine-univ düsseldorf       |
| 234 | el-bayoumi     | ma  | east lansing | mi                                   |
| 235 | leigh          | d   | edinburgh    |                                      |
| 236 | vendrell       | m   | edinburgh    |                                      |
| 237 | sharma         | mk  | eindhoven    | univ technol                         |
| 238 | sastre-santos  | a   | elche        | univ miguel hernandez, near alicante |
| 239 | huskens        | j   | enschede     |                                      |
| 240 | guldi          | dm  | erlangen     | friedrich-alexander-univ erlangen    |

|     |               |         |                  |                                    |
|-----|---------------|---------|------------------|------------------------------------|
| 241 | hirsch        | a       | erlangen         | univ erlangen nurnberg             |
| 242 | kuhn          | m       | eugene           | or, molecular probes               |
| 243 | gee           | r       | eugene           | or, molecular probes               |
| 244 | o'halloran    | t       | evanston         | il, northwestern univ              |
| 245 | woodruff      |         | evanston         | il, northwestern univ              |
| 246 | scandola      | f       | ferrara          |                                    |
| 247 | bianchi       | a       | firenze          |                                    |
| 248 | xiao          | hn      | fredericton      | univ new brunswick                 |
| 249 | hamachi       | i       | fukuoka          |                                    |
| 250 | imato         | t       | fukuoka          | kyushu univ                        |
| 251 | kusano        | s       | fukuoka          | fukuoka univ                       |
| 252 | ojida         | a       | fukuoka          |                                    |
| 253 | shinkai       | s       | fukuoka          |                                    |
| 254 | kubo          | k       | fukuoka/kanagawa |                                    |
| 255 | sheng         | rl      | funchal          | univ madeira, portugal             |
| 256 | wang          | dh      | fushun           | liaoning shihua univ               |
| 257 | xing          | y       | fushun           | liaoning shihua univ               |
| 258 | yang          | zx      | fushun           | liaoning shihua univ               |
| 259 | chen          | w       | fuzhou           | fuzhou med univ, fujian            |
| 260 | guo           | zy      | fuzhou           | fuzhou univ                        |
| 261 | hou           | lx      | fuzhou           | fuzhou univ                        |
| 262 | huang         | xy      | fuzhou           | fujian irsm, cas                   |
| 263 | lin           | zh      | fuzhou           | fujian normal univ                 |
| 264 | liu           | tf      | fuzhou           | fujian iinst res struct matter cas |
| 265 | liu           | jy      | fuzhou           | fuzhou univ, fujian                |
| 266 | lu            | j       | fuzhou           | fujian iinst res struct matter cas |
| 267 | sun           | wm      | fuzhou           | fuzhou med univ                    |
| 268 | you           |         | fuzhou           |                                    |
| 269 | zha           | dj      | fuzhou           | fuzhou med univ                    |
| 270 | zhu           | xd      | fuzhou           | fujian agric forest univ           |
| 271 | schulman      | sg      | gainesville      | fl                                 |
| 272 | fan           | xl      | ganzhou          | gannan normal univ, jianxi         |
| 273 | wu            | yq      | ganzhou          | gannan normal univ, jiangxi        |
| 274 | schuster      | m       | garching         | tum                                |
| 275 | biswas        | s       | gauhati          | iit                                |
| 276 | iyer          | pk      | gauhati          | iit                                |
| 277 | sarma         |         | gauhati          |                                    |
| 278 | pfeffer       | p       | geelong          |                                    |
| 279 | vauthey       | e       | geneva           | univ geneva                        |
| 280 | ueno          | y       | gifu             |                                    |
| 281 | houston       |         | gold coast       | aus                                |
| 282 | choi          | yongdoo | goyang           | natl cancer ctr                    |
| 283 | gonzalez-vera | ja      | granada          | univ granada                       |

|     |                |     |             |                                  |
|-----|----------------|-----|-------------|----------------------------------|
| 284 | aigner         |     | graz        |                                  |
| 285 | borisov        | sm  | graz        |                                  |
| 286 | klimant        | i   | graz        | graz univ technol                |
| 287 | knall          | ac  | graz        | graz univ technol                |
| 288 | leiner         | mjp | graz        | roche-optimedical                |
| 289 | müller         | bj  | graz        | graz univ technol                |
| 290 | defrancq       | e   | grenoble    | univ grenoble-alpes              |
| 291 | chen           | jx  | guangzhou   | southern med univ                |
| 292 | huo            | yp  | guangzhou   | guangdong univ technol           |
| 293 | liu            | f   | guangzhou   | guangzhou univ chinese med       |
| 294 | luo            | sh  | guangzhou   | south china normal univ/ south c |
| 295 | pan            | m   | guangzhou   | sun yat-sen univ                 |
| 296 | sun            | h   | guangzhou   | guangzhou unive                  |
| 297 | tan            | jh  | guangzhou   | sun yat-sen univ                 |
| 298 | wang           | ls  | guangzhou   | south china univ technol         |
| 299 | wang           | zy  | guangzhou   | south china normal univ/ south c |
| 300 | wu             | rb  | guangzhou   | sun yat-sen univ                 |
| 301 | zhang          | jy  | guangzhou   | guangzhou med univ               |
| 302 | zhou           | cq  | guangzhou   | southern med univ                |
| 303 | kim            | hj  | gumi        | kumoh nati inst technol, korea   |
| 304 | kim            | hj  | gumi        | kumoh natl inst technol          |
| 305 | shizuka        | h   | gunma       |                                  |
| 306 | unno           | m   | gunma       |                                  |
| 307 | baruah         | jb  | guwahati    | indian insti technol guwahati    |
| 308 | eichen         | y   | haifa       |                                  |
| 309 | nagamura       | t   | hamamatsu   | shizuoka univ                    |
| 310 | zhang          | xf  | hamilton    | on, mpc technol                  |
| 311 | huang          |     | hangzhou    |                                  |
| 312 | lv             | yy  | hangzhou    | zhejiang univ city coll          |
| 313 | qian           | gd  | hangzhou    | zhejiang univ                    |
| 314 | sun            | xy  | hangzhou    | zhejiang univ city coll          |
| 315 | wang           | xq  | hangzhou    | zhejiang acad agric sci          |
| 316 | zhu            | q   | hangzhou    | zhejiang univ technol            |
| 317 | fu             | y   | harbin      | northeast agric univ             |
| 318 | xia            |     | harbin      |                                  |
| 319 | xing           | zy  | harbin      | northeast agric univ             |
| 320 | yang           |     | harbin      |                                  |
| 321 | wallace        | kj  | hattiesburg | ms                               |
| 322 | diaz-fernandez | y   | havana      |                                  |
| 323 | guo            |     | hefei       |                                  |
| 324 | hu             | js  | hefei       | hefei insti phys sci, cas        |
| 325 | hu             | w   | hefei       | univ sci technol china           |
| 326 | hua            | rm  | hefei       | anhui agric univ                 |



|     |             |     |                   |                                    |
|-----|-------------|-----|-------------------|------------------------------------|
| 327 | liu         |     | hefei             |                                    |
| 328 | ma          | jj  | hefei             | univ sci technol china             |
| 329 | song        | qh  | hefei             | univ sci technol china             |
| 330 | wang        | y   | hefei             | anhui agric univ                   |
| 331 | yang        | jx  | hefei             | anhui university                   |
| 332 | yang        | xr  | hefei             | univ sci technol china             |
| 333 | zhang       | rl  | hefei             | anhui univ                         |
| 334 | zhang       | qj  | hefei             | univ sci technol china             |
| 335 | ou          | lj  | hengyang          | hunan inst technol                 |
| 336 | ohshita     | j   | higashi-hiroshima | hiroshima univ                     |
| 337 | ooyama      | y   | higashi-hiroshima | hiroshima univ                     |
| 338 | harima      | y   | hiroshima         |                                    |
| 339 | chan        | mcw | hongkong          |                                    |
| 340 | che         | cm  | hongkong          |                                    |
| 341 | fong        | wp  | hongkong          | chinese univ hongkong              |
| 342 | lo          | pc  | hongkong          | city univ hongkong                 |
| 343 | ng          | dkp | hongkong          | chinese univ hongkong              |
| 344 | yam         | vvw | hongkong          |                                    |
| 345 | liu         | hy  | houghton          | michigan tech univ                 |
| 346 | pati        | r   | houghton          | michigan tech univ                 |
| 347 | tiwari      | a   | houghton          | michigan tech univ                 |
| 348 | wensel      | tg  | houston           | baylor college med, tx             |
| 349 | xiao        | h   | houston           | rice univ, tx                      |
| 350 | ganguly     | j   | howrah            | indian inst eng sci technol        |
| 351 | lin         | hc  | hsinchu           | national chiao tung univ, taiwan   |
| 352 | wu          | sb  | hsinchu           | national chiao tung univ, taiwan   |
| 353 | hu          | js  | huainan           | anhui univ sci technol             |
| 354 | liu         | l   | huainan           | anhui univ sci technol             |
| 355 | zheng       | md  | huainan           | anhui univ sci technol             |
| 356 | cheng       | hr  | huangshi          | hubei polytechnic univ             |
| 357 | lu          | xj  | huangshi          | hubei polytechnic univ             |
| 358 | pischel     | u   | huelva            |                                    |
| 359 | samanta     | a   | hyderabad         |                                    |
| 360 | kim         | kc  | incheon           | inha univ                          |
| 361 | sarma       | tk  | indore            | indian inst technol indore         |
| 362 | saleh       |     | irbid             | jordan                             |
| 363 | petrushenko | i   | irkutsk           |                                    |
| 364 | fujimoto    |     | ishikawa          |                                    |
| 365 | marfin      | ys  | ivanovo           | ivanovo state univ                 |
| 366 | ksenofontov | aa  | Ivanovo           | krestov inst solution chem, russ a |
| 367 | jigyasa     |     | jalandhar         | dr. b r ambedkar nat inst technol  |
| 368 | moro        |     | jena              |                                    |
| 369 | willner     | i   | jeusalem          | hebrew univ                        |

|     |               |    |                |                                    |
|-----|---------------|----|----------------|------------------------------------|
| 370 | liu           | bz | jiaozuo        | henan polytechnic univ             |
| 371 | wu            | wn | jiaozuo        | henan polytechnic univ             |
| 372 | li            | qh | jibo           | shandong                           |
| 373 | cao           |    | jilin          |                                    |
| 374 | cui           | y  | jinan          | univ jinan                         |
| 375 | cui           | yz | jinan          | qilu univ technol                  |
| 376 | li            | my | jinan          | shandong                           |
| 377 | lin           | wy | jinan          | univ jinan                         |
| 378 | liu           | cy | jinan          | univ jinan                         |
| 379 | miao          | jy | jinan          | shandong                           |
| 380 | shen          | dz | jinan          | shandong normal univ               |
| 381 | sheng         | wl | jinan          | qilu univ technol                  |
| 382 | wang          | qb | jinan          | qilu univ technol                  |
| 383 | yang          | xf | jinan          | univ jinan                         |
| 384 | zhang         | dt | jinan          | shandong, qilu univ technol        |
| 385 | zhang         | xm | jinan          | shandong univ                      |
| 386 | zhao          | bx | jinan          | shandong                           |
| 387 | zhu           | bc | jinan          | univ jinan                         |
| 388 | chen          | g  | jinan/qufu     | shandong normal univ/qufu norm     |
| 389 | tang          | b  | jinan/qufu     | shandong normal univ/qufu norm     |
| 390 | jung          | jh | jinju          | gyeongsang natl univ               |
| 391 | kim           | sk | jinju          | korea                              |
| 392 | lee           | mh | jinju          | korea                              |
| 393 | lee           | ss | jinju          | korea                              |
| 394 | kose          | m  | kahramanmaras  | kahramanmaras sutcu imam univ      |
| 395 | jiang         | xd | kaifeng        | henan univ                         |
| 396 | zhao          | wl | kaifeng        | henan univ                         |
| 397 | venkataraman  | a  | kalaburagi     | gulbarga univ                      |
| 398 | ramström      | o  | kalmar         | linnaeus univ                      |
| 399 | ghosh         |    | kalyani        |                                    |
| 400 | angamuthu     | r  | kanpur         | iit                                |
| 401 | bharadwaj     | pk | kanpur         | iit                                |
| 402 | khan          |    | kanpur         |                                    |
| 403 | yang          | hw | kaohsiung      | nat sun yat-sen univ, taiwan       |
| 404 | venkatramaiah | n  | kattankulathur | srm inst sci technol               |
| 405 | mani          | t  | kawaguchi      | jst                                |
| 406 | bahulayan     | d  | kerala         | univ calicut                       |
| 407 | karami        | c  | kerman         | shahid bahonar univ kerman         |
| 408 | karami        | c  | kermanshah     | kermanshah univ med sci            |
| 409 | ghosh         | sk | kharagpur      |                                    |
| 410 | patra         | sk | kharagpur      |                                    |
| 411 | bricks        | jl | kiev           | inst org chem, nat acad sci ukrain |
| 412 | tsukamoto     | k  | kobe           | hyogo univ health sci              |

|     |              |    |               |                                     |
|-----|--------------|----|---------------|-------------------------------------|
| 413 | ooyama       | y  | kochi         |                                     |
| 414 | yoshida      | k  | kochi         |                                     |
| 415 | adhikari     | s  | kolkata       | univ calcutta                       |
| 416 | ali          | m  | kolkata       | jadavpur univ                       |
| 417 | bhattacharya | s  | kolkata       | indian assoc cultivation sci        |
| 418 | chattopadyay |    | kolkata       |                                     |
| 419 | dash         |    | kolkata       | iacs                                |
| 420 | ghosh        |    | kolkata       |                                     |
| 421 | guchait      |    | kolkata       |                                     |
| 422 | mondal       | tk | kolkata       | jadavpur univ                       |
| 423 | murmu        | n  | kolkata       | chittaranjan national cancer instit |
| 424 | purkayastha  | p  | kolkata       | IISER kolkata                       |
| 425 | roy          | p  | kolkata       | jadavpur univ                       |
| 426 | griesbeck    | ag | köln          | univ cologne                        |
| 427 | marx         | a  | konstanz      | univ konstanz (germany)             |
| 428 | kursunlu     | an | konya         | university of selcuk                |
| 429 | malkondu     | s  | konya/giresun | selcuk univ, turkey/giresun univ    |
| 430 | sasamoto     |    | kumamoto      |                                     |
| 431 | maeda        | h  | kusatsu       | ritsumeikan univ                    |
| 432 | kim          | hj | kwanju        | chonnam univ                        |
| 433 | hamachi      | i  | kyoto         |                                     |
| 434 | inouye       | k  | kyoto         | kyoto univ                          |
| 435 | nishio       | y  | kyoto         | kyoto univ                          |
| 436 | barbas       | c  | la jolla      | ca                                  |
| 437 | rebek        | jr | la jolla      | ca                                  |
| 438 | chen         | yl | lanzhou       | lanzhou univ                        |
| 439 | chen         | xg | lanzhou       | lanzhou univ                        |
| 440 | li           | q  | lanzhou       | gansu agric univ                    |
| 441 | liu          | xy | lanzhou       | lanzhou univ                        |
| 442 | liu          | k  | lanzhou       | lanzhou univ, gansu                 |
| 443 | peng         | y  | lanzhou       | univ lanzhou                        |
| 444 | shao         |    | lanzhou       |                                     |
| 445 | wu           | hl | lanzhou       | lanzhou jiaotong univ               |
| 446 | yang         | zy | lanzhou       | lanzhou univ, gansu                 |
| 447 | zhou         | bx | lanzhou       | lanzhou univ                        |
| 448 | grigg        | r  | leeds         |                                     |
| 449 | appleton     | b  | leeds         |                                     |
| 450 | overkleeft   | hs | leiden        |                                     |
| 451 | boens        | n  | leuven        | kul                                 |
| 452 | dehaen       | w  | leuven        | kul                                 |
| 453 | hofkens      |    | leuven        |                                     |
| 454 | smet         | m  | leuven        |                                     |
| 455 | wang         | xq | liaocheng     | liaocheng univ, shandong            |

|     |                 |     |                  |                                       |
|-----|-----------------|-----|------------------|---------------------------------------|
| 456 | yan             | b   | liaocheng        | liaocheng univ, shandong              |
| 457 | hu              | sj  | linkoping        |                                       |
| 458 | huang           | zj  | linkoping        |                                       |
| 459 | hu              | zj  | linköping        | linköping univ                        |
| 460 | pantazis        | a   | linköping        | linköping univ                        |
| 461 | lodeiro         | c   | lisbon           | unl                                   |
| 462 | pina            | f   | lisbon           | unl                                   |
| 463 | prata           | jv  | lisbon           | inst politechnico lisboa              |
| 464 | davidson        | rs  | london           | city univ                             |
| 465 | nguyen          | th  | london           | city univ london                      |
| 466 | resmini         | m   | london           | queen mary univ                       |
| 467 | watkinson       | m   | london           | queen mary univ                       |
| 468 | olcese          | r   | los angeles      | ucla                                  |
| 469 | pantazis        | a   | los angeles      | ucla                                  |
| 470 | stoddart        | jf  | los angeles      | ca                                    |
| 471 | cary            |     | los angeles?     |                                       |
| 472 | yunus           |     | louvain          |                                       |
| 473 | elias           | b   | louvain-la-neuve | univ catholique de louvain            |
| 474 | soumillion      | jp  | louvain-la-nueve |                                       |
| 475 | ramström        | o   | lowell           | univ massachusetts lowell             |
| 476 | yan             | md  | lowell           | univ massachusetts lowell             |
| 477 | sango           |     | lund             |                                       |
| 478 | ma              | lf  | luoyang          | luoyang normal univ, henan            |
| 479 | catalina        | f   | madrid           | csic                                  |
| 480 | de la escosura  | a   | madrid           |                                       |
| 481 | gonzalez-vera   | ja  | madrid           | instituto de química Medica (csic)    |
| 482 | herranz         | r   | madrid           | instituto de química Medica (csic)    |
| 483 | pardo           |     | madrid           |                                       |
| 484 | torres          | t   | madrid           |                                       |
| 485 | pitchumani      | k   | madurai          | kamaraj univ                          |
| 486 | perez-inestrosa | e   | malaga           |                                       |
| 487 | walt            | dr  | medford          | ma, tufts univ                        |
| 488 | bell            | tdm | melbourne        |                                       |
| 489 | tuck            |     | melbourne        |                                       |
| 490 | campagna        | s   | messina          |                                       |
| 491 | villari         | v   | messina          | cnr-ipcf istituto per i processi chir |
| 492 | thangarasu      | p   | mexico           | univ nacional autónoma de méxic       |
| 493 | gawley          | r   | miami            | fl                                    |
| 494 | leblanc         | r   | miami            | fl                                    |
| 495 | raptis          | rg  | miami            | florida international univ            |
| 496 | chang           | gj  | mianyang         | southwest univ sci technol            |
| 497 | chen            | jb  | mianyang         | china acad eng physics                |
| 498 | lei             |     | mianyang         | southwest univ, sichuan               |

|     |              |    |               |                                     |
|-----|--------------|----|---------------|-------------------------------------|
| 499 | ma           | jj | mianyang      | southwest univ sci technol, sichuan |
| 500 | sun          | j  | mianyang      | china acad eng physics, sichuan     |
| 501 | yang         | l  | mianyang      | southwest univ sci technol          |
| 502 | hossain      | m  | midnapore     | vidyasagar univ, west bengal        |
| 503 | quici        | s  | milano        |                                     |
| 504 | beharry      | aa | mississauga   | univ toronto mississauga            |
| 505 | mandal       | sk | mohali        | iiser mohali, punjab                |
| 506 | de           | p  | mohanpur      | indian inst sci educ res kolkata    |
| 507 | de silva     | sa | montclair     | nj                                  |
| 508 | cosa         | g  | montreal      | mcgill univ                         |
| 509 | masilamani   | d  | morristown    | nj, allied-signal                   |
| 510 | fedorova     | o  | moscow        | lomonosov state univ                |
| 511 | panchenko    |    | moscow        |                                     |
| 512 | magri        | dc | msida         | malta                               |
| 513 | datta        | a  | mumbai        | tata inst fundamental res           |
| 514 | mashraqui    |    | mumbai        |                                     |
| 515 | mohanty      |    | mumbai        |                                     |
| 516 | ravikanth    |    | mumbai        |                                     |
| 517 | sekar        | n  | mumbai        | inst chem technol                   |
| 518 | langhals     | h  | munich        |                                     |
| 519 | sutariya     | pg | nagar         | sardar patel univ                   |
| 520 | nakagawa     | h  | nagoya        | nagoya city univ                    |
| 521 | wanichacheva | n  | nakhon pathom | silpakorn univ                      |
| 522 | cao          | qy | nanchang      | jiangxi                             |
| 523 | hu           | b  | nanchang      | nanchang hangkong univ, jiangxi     |
| 524 | pu           | sz | nanchang      | jiangxi                             |
| 525 | qiu          | jd | nanchang      | nanchang univ, jiangxi              |
| 526 | wang         | y  | nanchang      | nanchang univ                       |
| 527 | zhang        | db | nanchang      | jiangxi                             |
| 528 | zhou         | l  | nanchang      | nanchang univ, jianxi               |
| 529 | cheng        | zj | nanchong      | china west normal univ, sichuan     |
| 530 | huang        | k  | nanchong      | china west normal univ              |
| 531 | qin          | db | nanchong      | china west normal univ, sichuan     |
| 532 | wang         | p  | nanchong      | china west normal univ, sichuan     |
| 533 | fan          | ql | nanjing       | nanjing univ post & telecommun      |
| 534 | guo          | zj | nanjing       |                                     |
| 535 | he           | i  | nanjing       |                                     |
| 536 | huang        | w  | nanjing       | nanjing univ post & telecommun      |
| 537 | jiang        | yl | nanjing       | nanjing normal univ                 |
| 538 | lai          | wy | nanjing       | nanjing univ post & telecommun      |
| 539 | lin          | zh | nanjing       | nanjing tech univ                   |
| 540 | liu          | cg | nanjing       |                                     |
| 541 | liu          | sj | nanjing       | nanjing univ post & telecommun      |

|     |            |    |             |                                |
|-----|------------|----|-------------|--------------------------------|
| 542 | qian       | y  | nanjing     | southeast univ                 |
| 543 | shen       | z  | nanjing     |                                |
| 544 | shen       | j  | nanjing     | nanjing normal univ            |
| 545 | shi        | ne | nanjing     | nanjing univ post & telecommun |
| 546 | wang       | bx | nanjing     | nanjing normal univ            |
| 547 | you        | xz | nanjing     |                                |
| 548 | zhao       | yg | nanjing     | nanjing tech univ              |
| 549 | zhao       | ll | nanjing     | nanjing univ                   |
| 550 | zhao       | q  | nanjing     | nanjing univ post & telecommun |
| 551 | zhu        | hj | nanjing     | nanjing tech univ              |
| 552 | zuo        |    | nanjing     |                                |
| 553 | liu1       |    | nanjing?    |                                |
| 554 | liu2       |    | nanjing?    |                                |
| 555 | wang       | j  | nanning     | guangxi univ                   |
| 556 | escudero   | d  | nantes      |                                |
| 557 | jacquemin  | d  | nantes      |                                |
| 558 | odobel     | f  | nantes      |                                |
| 559 | wu         | jy | nantou      | national chi nan univ, taiwan  |
| 560 | iwai       | k  | nara        | nara women's univ              |
| 561 | cao        |    | nebraska    |                                |
| 562 | gupta      | r  | new delhi   | univ delhi                     |
| 563 | adams      | dm | new york    | columbia                       |
| 564 | kulatileke | p  | new york    | baruch college                 |
| 565 | turro      | nj | new york    | columbia                       |
| 566 | li         | zx | newark      | new jersey inst technol        |
| 567 | yu         | mm | newark      | new jersey inst technol        |
| 568 | chen       | t  | ningbo      | cas zhejiang                   |
| 569 | russell    | a  | norwich     |                                |
| 570 | smith      | bd | notre dame  | in                             |
| 571 | besley     |    | nottingham  |                                |
| 572 | sutherland | aj | nottingham  | trent univ                     |
| 573 | magri      | dc | nova scotia | arcadia univ                   |
| 574 | brown      | gm | oak ridge   | tn                             |
| 575 | thakur     | a  | odisha      |                                |
| 576 | belfield   |    | orlando     | fl                             |
| 577 | akashi     | m  | osaka       | suita, osaka univ              |
| 578 | fukuzumi   | j  | osaka       |                                |
| 579 | hirai      | t  | osaka       | toyonaka                       |
| 580 | inouye     | m  | osaka       | sakai                          |
| 581 | kikuchi    |    | osaka       |                                |
| 582 | maeda      | h  | osaka       | suita, osaka univ              |
| 583 | majima     | t  | osaka       | osaka univ                     |
| 584 | nakatsuji  | y  | osaka       | osaka inst technol, omiya      |

|     |             |     |              |                                  |
|-----|-------------|-----|--------------|----------------------------------|
| 585 | tachikawa   | t   | osaka        | osaka univ                       |
| 586 | tanaka      | m   | osaka        | ikedata, aist kansai             |
| 587 | yagi        |     | osaka        |                                  |
| 588 | beer        | pd  | oxford       |                                  |
| 589 | piccionello |     | palermo      |                                  |
| 590 | mallet      |     | paris        |                                  |
| 591 | imperiali   | b   | pasadena     | ca                               |
| 592 | marcus      | r   | pasadena     | ca                               |
| 593 | luxami      | v   | pattiala     | thapar univ                      |
| 594 | amendola    | v   | pavia        |                                  |
| 595 | fabbrizzi   | l   | pavia        |                                  |
| 596 | pallavicini | p   | pavia        |                                  |
| 597 | jung        | jy  | pennsylvania |                                  |
| 598 | del giacco  | t   | perugia      | univ perugia                     |
| 599 | qiu         | jd  | pingxiang    | pingxiang univ, jiangxi          |
| 600 | koide       | k   | pittsburgh   |                                  |
| 601 | chang       | yt  | pohang       | Inst basic sci, postech          |
| 602 | kim         | sj  | pohang       | Inst basic sci, postech          |
| 603 | strongin    | r   | portland     | or                               |
| 604 | holdt       | hj  | potsdam      |                                  |
| 605 | schwarze    | t   | potsdam      |                                  |
| 606 | seeberger   | p   | potsdam      |                                  |
| 607 | wessig      | p   | potsdam      |                                  |
| 608 | brown       | rg  | preston      | univ north lancashire            |
| 609 | li          | adq | pullman      | wa, washington state univ        |
| 610 | chu         | ts  | qingdao      | qingdao univ                     |
| 611 | gui         | rj  | qingdao      |                                  |
| 612 | han         | kl  | qingdao      | shandong univ                    |
| 613 | shi         | dy  | qingdao      | inst oceanology/ctr ocean mega-s |
| 614 | wang        | lj  | qingdao      | inst oceanology/center ocean me  |
| 615 | zhang       | xf  | qinghuangdao | hebei normal univ                |
| 616 | sun         | zw  | qufu         | qufu normal univ, shandong       |
| 617 | liu         | jj  | qujing       | qujing normal univ, yunnan       |
| 618 | deiters     | a   | raleigh      | nc                               |
| 619 | finney      | ns  | raleigh      | nc                               |
| 620 | lindsey     | j   | raleigh      | nc                               |
| 621 | wang        | bh  | raleigh      | nc                               |
| 622 | lee         |     | raleigh?     | nc                               |
| 623 | levine      |     | redford      | mi                               |
| 624 | daub        | j   | regensburg   |                                  |
| 625 | wolfbeis    | os  | regensburg   |                                  |
| 626 | margulies   | d   | rehovot      |                                  |
| 627 | cadiou      | c   | reims        |                                  |

|     |                |    |                        |                                    |
|-----|----------------|----|------------------------|------------------------------------|
| 628 | chuburu        | f  | reims                  |                                    |
| 629 | lemercier      | g  | reims                  |                                    |
| 630 | tan-chang      |    | reno                   | nv                                 |
| 631 | durantini      | en | río cuarto             | univ nacional río cuarto           |
| 632 | saeva          | fd | rochester?             | kodak                              |
| 633 | dubonosov      | ad | rostov on don          | southern scientific centre russ ac |
| 634 | tikhomirova    | ks | rostov on don          | southern federal univ              |
| 635 | tusa           | j  | roswell                | ga, roche-optimedical              |
| 636 | kubo           | y  | saitama                |                                    |
| 637 | kolandaivel    | p  | salem                  | periyar univ                       |
| 638 | wang           | dh | salt lake city         | univ utah                          |
| 639 | tsien          | ry | san diego              | ca                                 |
| 640 | verkman        |    | san francisco          | ca                                 |
| 641 | singaram       | b  | santa cruz             | univ calif                         |
| 642 | whitten        | dg | santa fe               | nm                                 |
| 643 | matalobos      |    | santiago de compostela |                                    |
| 644 | martínez-calvo | m  | santiago de compostela | univ de santiago de compostela     |
| 645 | majee          | a  | santiniketan           | visva-bharati                      |
| 646 | ito            | m  | sapporo                | hokkaido univ                      |
| 647 | kubo           | k  | sapporo                |                                    |
| 648 | nakamura       |    | sapporo                |                                    |
| 649 | akasaka        | k  | sendai                 | tohoku univ                        |
| 650 | chatterjee     | a  | sendai                 | aist tohoku                        |
| 651 | osa            | t  | sendai                 | tohoku univ                        |
| 652 | suzuki         | i  | sendai                 | tohoku univ                        |
| 653 | teramae        | n  | sendai                 | tohoku univ                        |
| 654 | lee            | sw | seongnamdaero          | gachon univ                        |
| 655 | chang          | sk | seoul                  | chung-ang univ                     |
| 656 | cho            | br | seoul                  |                                    |
| 657 | hong           | ji | seoul                  | seoul natl univ                    |
| 658 | kim            | js | seoul                  | korea univ                         |
| 659 | kim            | c  | seoul                  | seoul natl univ sci technol        |
| 660 | kim            | ym | seoul                  | kyung hee univ                     |
| 661 | kim            | bg | seoul                  | konkuk univ                        |
| 662 | lee            | mh | seoul                  | sookmyung womens univ              |
| 663 | nam            | ww | seoul                  | ewha womens univ                   |
| 664 | park           | sn | seoul                  | korea univ                         |
| 665 | yoon           | jy | seoul                  | ewha womens univ                   |
| 666 | you            | ym | seoul                  | ewha womens univ                   |
| 667 | chakravarty    | m  | shamirpet mandal       | birla inst technol sci             |
| 668 | cheng          | jg | shanghai               | SIMIT, cas                         |
| 669 | feng           | c  | shanghai               | fudan univ                         |



|     |          |    |              |                                    |
|-----|----------|----|--------------|------------------------------------|
| 670 | gao      | eq | shanghai     | east china normal univ             |
| 671 | ge       | gb | shanghai     | shanghai univ trad chin med        |
| 672 | guo      | zq | shanghai     | ecust                              |
| 673 | he       | qg | shanghai     | SIMIT, cas                         |
| 674 | hou      |    | shanghai     |                                    |
| 675 | huang    | cs | shanghai     | shanghai normal univ               |
| 676 | huang    | xy | shanghai     | shanghaitech univ                  |
| 677 | li       |    | shanghai     | ecust                              |
| 678 | li       | xp | shanghai     | east china normal univ             |
| 679 | lou      | ky | shanghai     | ecust                              |
| 680 | lu       | ch | shanghai     | shanghai univ eng sci              |
| 681 | qian     | xh | shanghai     | ecust                              |
| 682 | qian     | jh | shanghai     | ecust                              |
| 683 | rasheed  | t  | shanghai     | shanghai jiaotong univ             |
| 684 | shi      |    | shanghai     | ecust                              |
| 685 | tian     | h  | shanghai     | ecust                              |
| 686 | wang     | cy | shanghai     | ecust                              |
| 687 | wang     | hy | shanghai     | shanghai univ                      |
| 688 | wang     | z  | shanghai     | shanghai jiaotong univ             |
| 689 | yan      | b  | shanghai     | tongji univ                        |
| 690 | yang     | l  | shanghai     | shanghai univ trad chin med        |
| 691 | yang     | yj | shanghai     | ecust                              |
| 692 | yang     | hb | shanghai     | east china normal univ             |
| 693 | yuan     | cx | shanghai     | tongji                             |
| 694 | zhang    | jj | shanghai     | ecust                              |
| 695 | zhang    | wb | shanghai     | ecust                              |
| 696 | zhou     | j  | shanghai     | shanghai jiaotong univ             |
| 697 | zhu      | wh | shanghai     | ecust                              |
| 698 | zhu      | ll | shanghai     | fudan univ                         |
| 699 | chen     |    | shanghai?    |                                    |
| 700 | hao      | yq | shangqiu     | shangqiu normal univ, henan        |
| 701 | wang     |    | shanxi       |                                    |
| 702 | ward     | md | sheffield    |                                    |
| 703 | ge       | ch | shenyang     | liaoning univ                      |
| 704 | li       | hd | shenyang     | criminal investigation police univ |
| 705 | wang     | y  | shenyang     | criminal investigation police univ |
| 706 | zhang    | xd | shenyang     | liaoning univ                      |
| 707 | meng     | xq | shenzhen     | shenzhen inst adv tech             |
| 708 | wang     | k  | shijiazhuang | hebei normal univ                  |
| 709 | wei      | yj | shijiazhuang | hebei normal univ                  |
| 710 | yu       | xd | shijiazhuang | hebei univ sci technol             |
| 711 | khatua   | s  | shillong     | north eastern hill univ            |
| 712 | hirakawa |    | shizuoka     |                                    |

|     |               |    |            |                               |
|-----|---------------|----|------------|-------------------------------|
| 713 | toyooka       |    | shizuoka   |                               |
| 714 | mahapatra     | ak | sibpur     | iiest near howrah             |
| 715 | ihmels        | h  | siegen     |                               |
| 716 | han           |    | singapore  |                               |
| 717 | liu           | xg | singapore  | singapore univ technol design |
| 718 | liu           | b  | singapore  | nat univ singapore            |
| 719 | selvan        | st | singapore  | nat univ singapore            |
| 720 | valiyaveettil | s  | singapore  | nus                           |
| 721 | zhao          | d  | singapore  | nus                           |
| 722 | zhao          | yl | singapore  | nanyang tech univ             |
| 723 | heagy         | md | socorro    | nm, nm inst mines tech        |
| 724 | bojinov       | vb | sofia      |                               |
| 725 | grabchev      | i  | sofia      |                               |
| 726 | inoue         | mb | sonora     |                               |
| 727 | machi         | l  | sonora     |                               |
| 728 | zysman-colman | e  | st andrews | univ st andrews               |
| 729 | ramström      | o  | stockholm  | kth                           |
| 730 | yan           | md | stockholm  | kth                           |
| 731 | burdette      | s  | storrs     | ct                            |
| 732 | bruckner      |    | storrs     | ct                            |
| 733 | jang          | hs | storrs     | ct                            |
| 734 | mani          | t  | storrs     | univ connecticut              |
| 735 | lehn          | jm | strasbourg |                               |
| 736 | vicens        | j  | strasbourg |                               |
| 737 | weiss         | j  | strasbourg |                               |
| 738 | greiner       |    | stuttgart  |                               |
| 739 | kim           | hm | suwon      | ajou univ                     |
| 740 | kim           |    | suwon      | korea                         |
| 741 | dong          | wf | suzhou     | suzhou ibet, cas              |
| 742 | ge            | jf | suzhou     | soochow univ/suzhou ibet, cas |
| 743 | ji            |    | suzhou     |                               |
| 744 | li            | yq | suzhou     | soochow univ                  |
| 745 | sun           | r  | suzhou     | soochow univ                  |
| 746 | xu            | yj | suzhou     | soochow univ                  |
| 747 | crossley      | m  | sydney     |                               |
| 748 | rutledge      | p  | sydney     |                               |
| 749 | todd          | m  | sydney     |                               |
| 750 | nakamura      |    | taejon     | korea                         |
| 751 | ge            | yq | tai an     | taishan univ, shandong        |
| 752 | zheng         | zb | tai an     | taishan univ, shandong        |
| 753 | chang         | cc | taiwan     | natl chung hsing univ         |
| 754 | chen          | cm | taiwan     | natl chung hsing univ         |
| 755 | chiu          |    | taiwan     |                               |

|     |                 |    |                     |                                 |
|-----|-----------------|----|---------------------|---------------------------------|
| 756 | hsu             |    | taiwan              |                                 |
| 757 | luo             | ft | taiwan              | acad sinica taipei              |
| 758 | sung            |    | taiwan              |                                 |
| 759 | feng            | lh | taiyuan             | shanxi univ                     |
| 760 | guo             |    | taiyuan             | shanxi                          |
| 761 | jin             |    | taiyuan             | shanxi                          |
| 762 | shuang          | sm | taiyuan             | shanxi univ                     |
| 763 | zhu             | l  | tallahassee         | fl                              |
| 764 | azadbakht       | r  | tehran              | payame noor univ, iran          |
| 765 | rashidi-ranjbar | p  | tehran              | univ tehran                     |
| 766 | rouhani         | s  | tehran              | inst fcolor sci technol         |
| 767 | safarifard      | v  | tehran              | iran univ sci technol           |
| 768 | tian            |    | tempe               | az                              |
| 769 | gabbai          |    | texas               |                                 |
| 770 | ajayaghosh      | a  | thiruvananthapuram  |                                 |
| 771 | rajasekharan    |    | thiruvananthapuram  |                                 |
| 772 | ramaiah         |    | thiruvananthapuram  |                                 |
| 773 | varma           |    | thiruvananthapuram? |                                 |
| 774 | yang            | gm | tianjin             | nankai univ                     |
| 775 | finney          | ns | tianjin             | tianjin univ                    |
| 776 | he              | hr | tianjin             | heowns biochem technol          |
| 777 | li              | hr | tianjin             | hebei univ technol              |
| 778 | li              | y  | tianjin             | nankai univ                     |
| 779 | liu             | dy | tianjin             | tianjin agric univ/nankai univ  |
| 780 | ruan            | wj | tianjin             | nankai univ                     |
| 781 | xiao            | lh | tianjin             | nankai univ                     |
| 782 | xu              | y  | tianjin             | hebei univ technol              |
| 783 | yang            | ec | tianjin             | tianjin normal univ             |
| 784 | zeng            |    | tianjin             |                                 |
| 785 | zhao            | xj | tianjin             | tianjin normal univ             |
| 786 | zhu             | hl | tianjin             | tianjin agric univ/nankai univ  |
| 787 | liu             | k  | tianshui            | tianshui normal univ, gansu     |
| 788 | ochoa-teran     | a  | tijuana             | inst tecnol tijuana             |
| 789 | pina-luis       | gm | tijuana             | inst tecnol tijuana             |
| 790 | araki           | k  | tokyo               | tokyo univ, inst industrial sci |
| 791 | imai            | k  | tokyo               |                                 |
| 792 | kagechika       |    | tokyo               |                                 |
| 793 | minami          | t  | tokyo               | univ tokyo                      |
| 794 | nagano          | t  | tokyo               |                                 |
| 795 | oka             |    | tokyo               | keio univ                       |
| 796 | otsuki          | j  | tokyo               | nihon univ                      |
| 797 | segawa          |    | tokyo               |                                 |
| 798 | tanaka          |    | tokyo               |                                 |

|     |               |       |            |                                  |
|-----|---------------|-------|------------|----------------------------------|
| 799 | urano         | y     | tokyo      | univ tokyo                       |
|     | dorazco-      |       |            |                                  |
| 800 | gonzález      | a     | toluca     | univ nacional autónoma de méxic  |
| 801 | el-safty      | sa    | tsukuba    | nims                             |
| 802 | nabeshima     |       | tsukuba    |                                  |
| 803 | angelovski    | g     | tübingen   | max planck inst biol cybernetics |
| 804 | valkan        |       | turkey?    |                                  |
| 805 | motoyoshiya   | j     | ueda       | nagano                           |
| 806 | moller        | m     | ulm        |                                  |
| 807 | hur           | sh    | ulsan      | university of ulsan              |
| 808 | iah           | ms    | ulsan      | ulsan nat inst sci technol       |
| 809 | jana          | atanu | ulsan      | ulsan nat inst sci technol       |
| 810 | jang          | hs    | ulsan      | ibs                              |
| 811 | kwon          | oh    | ulsan      | ulsan nat inst sci technol       |
| 812 | lee           | hi    | ulsan      | univ ulsan                       |
| 813 | lim           | mh    | ulsan      | unist                            |
| 814 | jo            | sb    | university | univ mississippi                 |
| 815 | fusi          | v     | urbino     |                                  |
| 816 | georgi        | l     | urbino     |                                  |
| 817 | miceloni      | m     | urbino     |                                  |
| 818 | patel         | al    | vadodara   | maharaja sayajirao univ baroda   |
| 819 | costero       | a     | valencia   |                                  |
| 820 | garcia-espana | e     | valencia   |                                  |
| 821 | miranda       | m     | valencia   |                                  |
| 822 | misra         | a     | varanasi   |                                  |
| 823 | singh         | vp    | varanasi   | banaras hindu univ               |
| 824 | lodeiro       | c     | vigo       |                                  |
| 825 | kimura        | k     | wakayama   |                                  |
| 826 | sakamoto      | h     | wakayama   |                                  |
| 827 | moore         | p     | warwick    |                                  |
| 828 | dong          | jh    | weifang    | weifang med univ, shandong       |
| 829 | mohr          | gj    | weiz       | joanneum res forschungsgesellscl |
| 830 | huang         | zs    | wenzhou    | wenzhou med univ                 |
| 831 | ye            | xx    | wenzhou    | wenzhou med univ, zhejiang       |
| 832 | d'souza       | f     | wichita    | ks                               |
| 833 | hancock       | rd    | wilmington | nc                               |
| 834 | smith         |       | wisconsin  | wi                               |
| 835 | blough        | n     | woods hole | ma                               |
| 836 | han           | g     | worcester  | univ massachusetts med sch       |
| 837 | cheng         | xj    | wuhan      | wuhan inst technol               |
| 838 | dai           | j     | wuhan      | hust                             |
| 839 | huang         | zl    | wuhan      | hust                             |
| 840 | li            | c     | wuhan      | hust                             |

|     |          |    |           |                            |
|-----|----------|----|-----------|----------------------------|
| 841 | liu      | zh | wuhan     | wuhan univ                 |
| 842 | liu      | cl | wuhan     | central china normal univ  |
| 843 | lou      | xd | wuhan     | china univ geosciences     |
| 844 | wang     | c  | wuhan     | wuhan univ                 |
| 845 | wang     | h  | wuhan     | wuhan univ                 |
| 846 | yin      | j  | wuhan     | central china normal univ  |
| 847 | zhang    | zl | wuhan     | wuhan univ                 |
| 848 | zhang    | s  | wuhan     | wuhan inst phys math       |
| 849 | zhang    | d  | wuhan     | central china normal univ  |
| 850 | zhou     | jp | wuhan     | wuhan univ                 |
| 851 | zhu      | mq | wuhan     | hust                       |
| 852 | gao      | f  | wuhu      | anhui normal univ          |
| 853 | hao      | eh | wuhu      | anhui                      |
| 854 | jiao     | lj | wuhu      | anhui                      |
| 855 | sun      | jy | wuhu      | anhui normal univ          |
| 856 | wang     | gf | wuhu      | anhui normal univ          |
| 857 | mothika  | vs | wuppertal | bergische univ wuppertal   |
| 858 | wurthner | f  | wurzburg  |                            |
| 859 | sauer    | m  | würzburg  | univ würzburg              |
| 860 | song     | qj | wuxi      | jiangnan univ              |
| 861 | xie      | mh | wuxi      | jiangsu inst nucl med      |
| 862 | zhang    | k  | wuxi      | jiangsu inst nucl med      |
| 863 | jiang    | yb | xiamen    | fujian                     |
| 864 | bian     | lj | xian      | northwest univ             |
| 865 | fang     | y  | xian      | shaanxi normal univ        |
| 866 | huang    | w  | xian      | northwestern polytech univ |
| 867 | lai      | wy | xian      | northwest polytech univ    |
| 868 | li       |    | xian      |                            |
| 869 | li       | h  | xian      | xian shiyou univ           |
| 870 | li       | jl | xian      | northwest univ             |
| 871 | li       | bx | xian      | shaanxi normal univ        |
| 872 | liu      |    | xian      |                            |
| 873 | liu      | c  | xian      | shaanxi normal univ        |
| 874 | ren      | w  | xian      | shaanxi normal univ        |
| 875 | tang     | yl | xian      | shaanxi normal univ        |
| 876 | yang     |    | xian      |                            |
| 877 | yang     | xf | xian      | northwest univ             |
| 878 | yang     | xf | xian      | northwest univ             |
| 879 | chen     | j  | xiangtan  | hunan ust                  |
| 880 | li       | cy | xiangtan  | xiangtan univ, hunan       |
| 881 | li       | yf | xiangtan  | xiangtan univ              |
| 882 | wan      | yc | xiangtan  | hunan univ sci technol     |
| 883 | zeng     | rj | xiangtan  | hunan ust                  |

|     |           |    |               |                                     |
|-----|-----------|----|---------------|-------------------------------------|
| 884 | sun       | sg | xianyang      | northwest agr. food univ, shaanxi   |
| 885 | zeng      | lt | xiaogan       | hubei, hubei engn univ              |
| 886 | li        | xc | xinxiang      | henan normal univ                   |
| 887 | wang      | hb | xinyang       | xinyang normal univ, henan          |
| 888 | wu        | gg | xuzhou        | jiangsu, china univ mining technol  |
| 889 | kondo     | s  | yamagata      |                                     |
| 890 | dong      | bx | yangzhou      | yangzhou univ                       |
| 891 | liu       | wl | yangzhou      | yangzhou univ                       |
| 892 | chen      | lx | yantai        | shandong                            |
| 893 | yu        | fb | yantai        | china acad sci, yantai inst coastal |
| 894 | santra    | s  | yekaterinburg | ural federal univ                   |
| 895 | zyryanov  | gv | yekaterinburg | ural federal univ/ural div russ aca |
| 896 | chen      | wf | yichang       | china three gorges univ hubei       |
| 897 | dong      | jh | yokohama      | tokyo inst technol                  |
| 898 | suzuki    | k  | yokohama      | keio univ                           |
| 899 | ueda      | h  | yokohama      | tokyo inst technol                  |
| 900 | kim       | ym | yongin        | dankook univ                        |
| 901 | park      | ny | yongin-si     | gyeyonggi-do                        |
| 902 | zinic     |    | zagreb?       |                                     |
| 903 | du        | cx | zhengzhou     | zhengzhou univ                      |
| 904 | li        | zx | zhengzhou     | zhengzhou univ, henan               |
| 905 | liu       | xj | zhengzhou     | zhengzhou univ, henan               |
| 906 | ma        | lf | zhengzhou     | zhengzhou univ, henan               |
| 907 | yu        | mm | zhengzhou     | zhengzhou univ, henan               |
| 908 | zang      | sq | zhengzhou     | zhengzhou univ, henan               |
| 909 | wang      | fm | zhenjiang     | jiangsu univ sci technol            |
| 910 | yang      | wm | zhenjiang     | jiangsu univ                        |
| 911 | seeberger | p  | zurich        |                                     |
| 912 | finney    | ns | zurich        | univ zurich                         |
